# Supplementary material for: Isolation and characterization of an annelated N-heterocyclic carbene stabilized Breslow enolate
Source: Royal Society of Chemistry journal article supplement (doi:10.1039/d3qo01644g), 2023-12-15
Supplement: d3qo01644g1.pdf [file d3qo01644g1.pdf]

*Electronic Supplementary Information for*

**Isolation and Characterization of Annelated N-Heterocyclic Carbene  
Stabilized Breslow Enolate**

Xin Li, Yan-Yan Ren, Can Chen, Li-Ying Sun, and Ying-Feng Han\*

Key Laboratory of Synthetic and Natural Functional Molecule of the Ministry of Education,  
College of Chemistry and Materials Science, Northwest University, Xi'an 710127, P. R. China

E-mail: yfhan@nwu.edu.cn

## Table of Contents

|                                                                                          |     |
|------------------------------------------------------------------------------------------|-----|
| 1. Experimental section                                                                  | S2  |
| 1.1 Materials and methods                                                                | S2  |
| 1.2 Synthesis of compounds <b>2a–d</b>                                                   | S2  |
| 1.3 Synthesis of compounds <b>3a–d</b>                                                   | S4  |
| 1.4 Synthesis of compound [( <b>4a</b> )K] <sub>2</sub> (Et <sub>2</sub> O) <sub>2</sub> | S5  |
| 2. NMR spectra                                                                           | S5  |
| 3. HRMS spectra                                                                          | S10 |
| 4. Cyclic voltammetry                                                                    | S12 |
| 5. X-ray crystallography                                                                 | S12 |
| 6. EPR spectra                                                                           | S19 |
| 7. Computation details                                                                   | S20 |
| 8. UV-vis spectra                                                                        | S22 |
| 9. TGA spectra                                                                           | S28 |
| 10. Cartesian coordinates of the optimized geometries by DFT calculations                | S29 |
| 11. Abstracted results of TD-DFT calculations                                            | S42 |
| 12. References                                                                           | S47 |

## 1. Experimental section

### 1.1 Materials and methods

All manipulations were carried out in an argon atmosphere using standard Schlenk techniques and a glove box. All solvents were dried over Na/benzophenone or CaH<sub>2</sub> and distilled before use. Glassware was heated in a box furnace at 130°C before use. The starting material IPr(BIAN) (**1**) was synthesized using the literature procedure.<sup>1,2</sup> Radicals **C** and **D** derived from classical NHCs have been synthesized based on literature methods.<sup>3,4</sup> NMR spectra were recorded on Bruker AVANCE III 400, and chemical shifts are reported relative to the solvent residual peak: CD<sub>3</sub>CN (<sup>1</sup>H,  $\delta$  = 1.94 ppm and <sup>13</sup>C,  $\delta$  = 118.3, 1.3 ppm). Mass spectra were obtained with Bruker Micro TOF-Q II mass spectrometer (Bruker Daltonics Corp., USA) in the electrospray ionization (ESI) mode. UV-vis spectra were recorded using a UV-3600 Plus in the 200-900 nm range. The TGA spectra were carried on the NETZSCH STA 449C microanalyzer from room temperature to 800°C at the heating rate of 10°C min<sup>-1</sup>.

### 1.2 Synthesis of compounds 2a-d

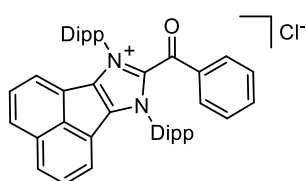

**2a:** Benzoyl chloride (37.9 mg, 0.270 mmol) was added to a stirred solution of carbene **1** (115.4 mg, 0.225 mmol) in 25 mL of dry THF at room temperature. A lot of light green precipitate was immediately formed. After stirring for 20 min, the supernatant was removed by filtration, the resulting solid was washed with hexanes (3×10 mL). Then dried under vacuum to yield **2a** as a yellow solid. Yield: 110.1 mg, 75%. <sup>1</sup>H NMR (400 MHz, CD<sub>3</sub>CN):  $\delta$  = 8.22 (d,  $J$  = 8.3 Hz, 2H), 7.80 (d,  $J$  = 7.8 Hz, 2H), 7.76–7.67 (m, 5H), 7.49–7.54 (m, 6H), 7.39 (d,  $J$  = 7.2 Hz, 2H), 2.88 (sept,  $J$  = 6.7 Hz, 4H), 1.20 (d,  $J$  = 6.7 Hz, 12H), 1.05 (d,  $J$  = 6.7 Hz, 12H) ppm. <sup>13</sup>C{<sup>1</sup>H} NMR (100 MHz, CD<sub>3</sub>CN):  $\delta$  = 181.8, 146.6, 143.9, 140.2, 137.8, 134.7, 134.0, 132.7, 132.1, 131.0, 130.5, 129.6, 128.8, 126.8, 126.0, 123.0, 30.2, 25.8, 23.4 ppm. HRMS (ESI, positive ions):  $m/z$  = 617.3518 (calcd for [**2a**-Cl]<sup>+</sup> 617.3526). UV-vis (DMF,  $\lambda$ ): 286, 321, 370 nm.

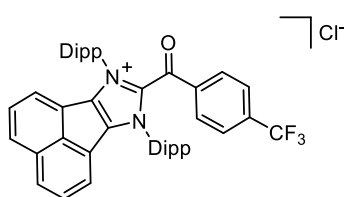

**2b:** 4-(trifluoromethyl)-benzoyl chloride (56.2 mg, 0.270 mmol) was added to a stirred solution of carbene **1** (115.4 mg, 0.225 mmol) in 25 mL of dry THF at room temperature. A lot of light green precipitate was immediately formed. After stirring for 10 min, the supernatant was removed by filtration, the resulting solid was washed with hexanes (3×10 mL). Then dried under vacuum to yield **2b** as a yellow solid. Yield: 105.3 mg, 65%. <sup>1</sup>H NMR (400 MHz, CD<sub>3</sub>CN):  $\delta$  = 8.24 (d,  $J$  = 8.4 Hz, 2H), 7.77–7.83 (m, 4H),

7.71 (t,  $J = 7.9$  Hz, 4H), 7.50 (d,  $J = 8.2$  Hz, 2H), 7.40 (d,  $J = 7.1$  Hz, 2H), 2.82 (sept,  $J = 6.7$  Hz, 4H), 1.22 (d,  $J = 6.7$  Hz, 12H), 1.05 (d,  $J = 6.7$  Hz, 12H) ppm.  $^{13}\text{C}\{^1\text{H}\}$  NMR (100 MHz,  $\text{CD}_3\text{CN}$ ):  $\delta = 181.0, 146.4, 142.5, 140.9, 138.2, 136.7, 136.4, 134.0, 133.0, 132.8, 131.1, 130.5, 129.7, 129.0, 127.7, 127.0, 126.4, 122.8, 30.2, 25.7, 23.4$  ppm. HRMS (ESI, positive ions):  $m/z = 685.3384$  (calcd for  $[\mathbf{2b}\text{-Cl}]^+$  685.3340). UV-vis (DMF,  $\lambda$ ): 286, 322, 369 nm.

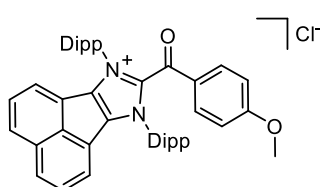

**2c:** 4-(methoxy)-benzoyl chloride (46.0 mg, 0.270 mmol) was added to a stirred solution of carbene **1** (115.4 mg, 0.225 mmol) in 25 mL of dry THF at room temperature. A lot of light green precipitate was immediately formed.

After stirring for 10 min, the supernatant was removed by filtration, the resulting solid was washed with hexanes ( $3 \times 10$  mL). Then dried under vacuum to yield **2c** as a green solid. Yield: 75.2 mg, 49%.  $^1\text{H}$  NMR (400 MHz,  $\text{CD}_3\text{CN}$ ):  $\delta = 8.19$  (d,  $J = 8.3$  Hz, 2H), 7.85 (d,  $J = 8.8$  Hz, 2H), 7.66–7.72 (m, 4H), 7.51 (d,  $J = 7.9$  Hz, 4H), 7.37 (d,  $J = 7.2$  Hz, 2H), 7.02 (d,  $J = 8.9$  Hz, 2H), 3.86 (s, 3H), 2.92 (sept,  $J = 6.7$  Hz, 4H), 1.20 (d,  $J = 6.7$  Hz, 12H), 1.05 (d,  $J = 6.7$  Hz, 12H) ppm.  $^{13}\text{C}\{^1\text{H}\}$  NMR (100 MHz,  $\text{CD}_3\text{CN}$ ):  $\delta = 178.4, 167.9, 146.8, 144.9, 139.8, 133.9, 133.8, 132.5, 131.7, 131.0, 129.6, 128.7, 127.3, 126.8, 125.8, 123.1, 116.6, 56.9, 30.2, 25.8, 23.5$  ppm. HRMS (ESI, positive ions):  $m/z = 647.3617$  (calcd for  $[\mathbf{2c}\text{-Cl}]^+$  647.3632). UV-vis (DMF,  $\lambda$ ): 286, 321, 381 nm.

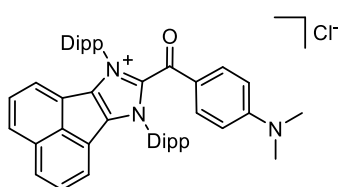

**2d:** 4-(dimethylamino)-benzoyl chloride (47.5 mg, 0.270 mmol) was added to a stirred solution of carbene **1** (115.4 mg, 0.225 mmol) in 25 mL of dry THF at room temperature. A lot of yellow-brown precipitate was immediately formed. After stirring for 30 min, the supernatant was removed

by filtration, the resulting solid was washed with hexanes ( $3 \times 10$  mL). Then dried under vacuum to yield **2d** as an orange-red solid. Yield: 73.4 mg, 47%.  $^1\text{H}$  NMR (400 MHz,  $\text{CD}_3\text{CN}$ ):  $\delta = 8.16$  (d,  $J = 8.4$  Hz, 2H), 7.71–7.64 (m, 6H), 7.50 (d,  $J = 7.9$  Hz, 4H), 7.33 (d,  $J = 7.0$  Hz, 2H), 6.67 (d,  $J = 9.2$  Hz, 2H), 3.06 (s, 6H), 2.96 (sept,  $J = 6.7$  Hz, 4H), 1.21 (d,  $J = 6.7$  Hz, 12H), 1.04 (d,  $J = 6.7$  Hz, 12H) ppm.  $^{13}\text{C}\{^1\text{H}\}$  NMR (100 MHz,  $\text{CD}_3\text{CN}$ ):  $\delta = 174.9, 156.8, 147.0, 146.8, 139.3, 133.7, 133.6, 132.1, 131.4, 130.9, 129.5, 129.0, 126.7, 125.5, 123.6, 121.3, 112.9, 40.5, 30.2, 25.9, 23.6$  ppm. HRMS (ESI, positive ions):  $m/z = 660.3927$  (calcd for  $[\mathbf{2d}\text{-Cl}]^+$  660.3948). UV-vis (DMF,  $\lambda$ ): 288, 322, 400 nm.

### 1.3 Synthesis of compounds 3a–d

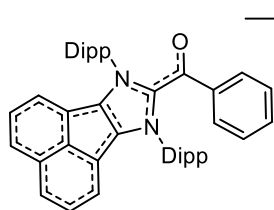

• **3a:** Zn powder (5.0 mg, 0.077 mmol) was added to a THF (5.0 mL) solution of **2a** (100 mg, 0.153 mmol). The mixture was stirred at room temperature for 2 days. After which removal of the solvent under reduced pressure. The residual solid was extracted with diethyl ether and then filtered over celite and removal of all volatiles afforded compound **3a** as a brick-red solid. Yield: 66.2 mg, 70%. UV-vis (DMF,  $\lambda$ ): 275, 321, 395 nm.

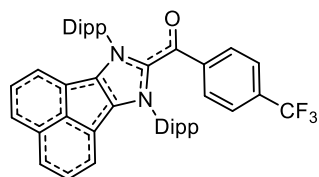

• **3b:** Zn powder (4.6 mg, 0.070 mmol) was added to a THF (5.0 mL) solution of **2b** (100 mg, 0.139 mmol). The mixture was stirred at room temperature for 8 h. After which removal of the solvent under reduced pressure. The residual solid was extracted with diethyl ether and then filtered over celite and removal of all volatiles afforded compound **3b** as a bottle-green solid. Yield: 68.5 mg, 72%. UV-vis (DMF,  $\lambda$ ): 275, 320, 428 nm.

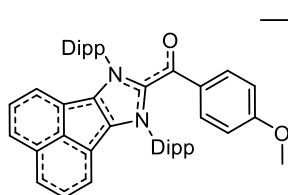

• **3c:**  $\text{KC}_8$  (23.8 mg, 0.176 mmol) was added to a THF (10.0 mL) solution of **2c** (100 mg, 0.147 mmol) at  $-35^\circ\text{C}$ . The mixture was stirred at room temperature for 6 h. After which removal of the solvent under reduced pressure. The residual solid was extracted with diethyl ether and then filtered over celite and removal of all volatiles afforded compound **3c** as a brick-red solid. Yield: 76.8 mg, 81%. UV-vis (DMF,  $\lambda$ ): 285, 322, 414, 440 nm.

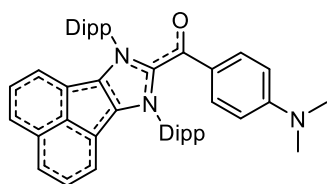

• **3d:**  $\text{KC}_8$  (23.4 mg, 0.173 mmol) was added to a THF (8.0 mL) solution of **2d** (100 mg, 0.144 mmol) at  $-35^\circ\text{C}$ . The mixture was stirred at room temperature for 6 h. After which removal of the solvent under reduced pressure. The residual solid was extracted with diethyl ether and then filtered over celite and removal of all volatiles afforded compound **3d** as a brick-red solid. Yield: 79.8 mg, 84%. UV-vis (DMF,  $\lambda$ ): 285, 320, 428 nm.

#### 1.4 Synthesis of compound [(4a)K]<sub>2</sub>(Et<sub>2</sub>O)<sub>2</sub>

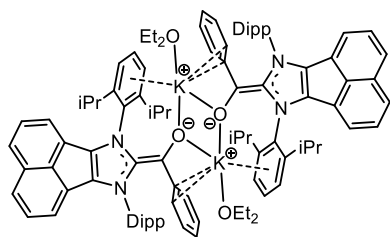

[(4a)K]<sub>2</sub>(Et<sub>2</sub>O)<sub>2</sub>: KC<sub>8</sub> (32.4 mg, 0.24 mmol) was added to a THF (5.0 mL) solution of **3a** (124 mg, 0.2 mmol) at -35°C. The mixture was stirred at room temperature for 2 h. After which removal of the solvent under reduced pressure. The residual solid was extracted with diethyl ether and then filtered over celite and removal of all volatiles afforded compound [(4a)K]<sub>2</sub>(Et<sub>2</sub>O)<sub>2</sub>. Yield:

104.54 mg, 65%. UV-vis (DMF, λ): 290, 319, 417, 550, 780 nm. <sup>1</sup>H NMR (400 MHz, C<sub>6</sub>D<sub>6</sub>): δ = 7.31–7.24 (4H), 7.12 (d, *J* = 7.8 Hz, 4H), 7.10 (d, *J* = 7.8 Hz, 4H), 6.95–6.88 (12H), 6.87–6.85 (m, 2H), 6.30 (dt, *J* = 9.8, 2.0 Hz, 2H), 5.11 (dt, *J* = 9.7, 3.9 Hz, 2H), 4.27 (4H), 2.85 (sept, *J* = 6.9 Hz, 4H), 2.70 (sept, *J* = 6.9 Hz, 4H), 1.16 (d, *J* = 6.8 Hz, 12H), 1.07 (d, *J* = 6.9 Hz, 12H), 1.03 (d, *J* = 6.9 Hz, 12H), 0.98 (d, *J* = 6.8 Hz, 12H) ppm. <sup>13</sup>C NMR (100 MHz, C<sub>6</sub>D<sub>6</sub>): δ = 146.8, 146.4, 140.3, 138.8, 137.5, 130.8, 130.7, 130.6, 129.4, 129.2, 128.1, 127.1, 125.3, 124.2, 121.1, 118.4, 117.7, 117.3, 113.2, 111.6, 108.7, 29.0, 28.9, 24.6, 24.3, 24.1, 23.9 ppm.

#### 2. NMR spectra

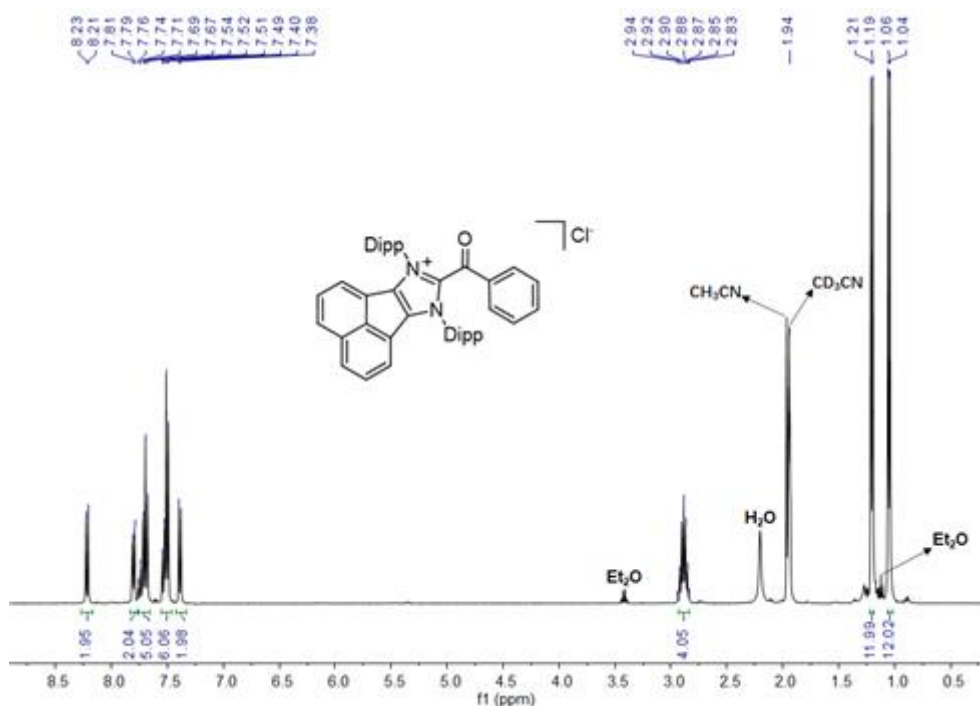

Figure S1. <sup>1</sup>H NMR spectrum (400 MHz, CD<sub>3</sub>CN) of **2a**.

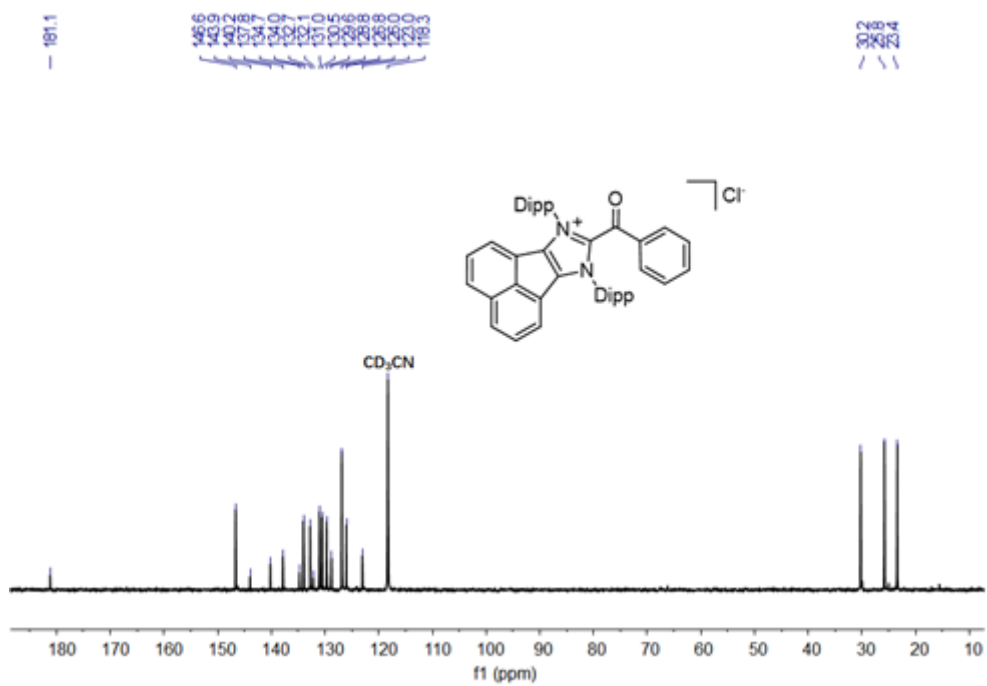

Figure S2.  $^{13}\text{C}\{^1\text{H}\}$  NMR spectrum (100 MHz,  $\text{CD}_3\text{CN}$ ) of 2a.

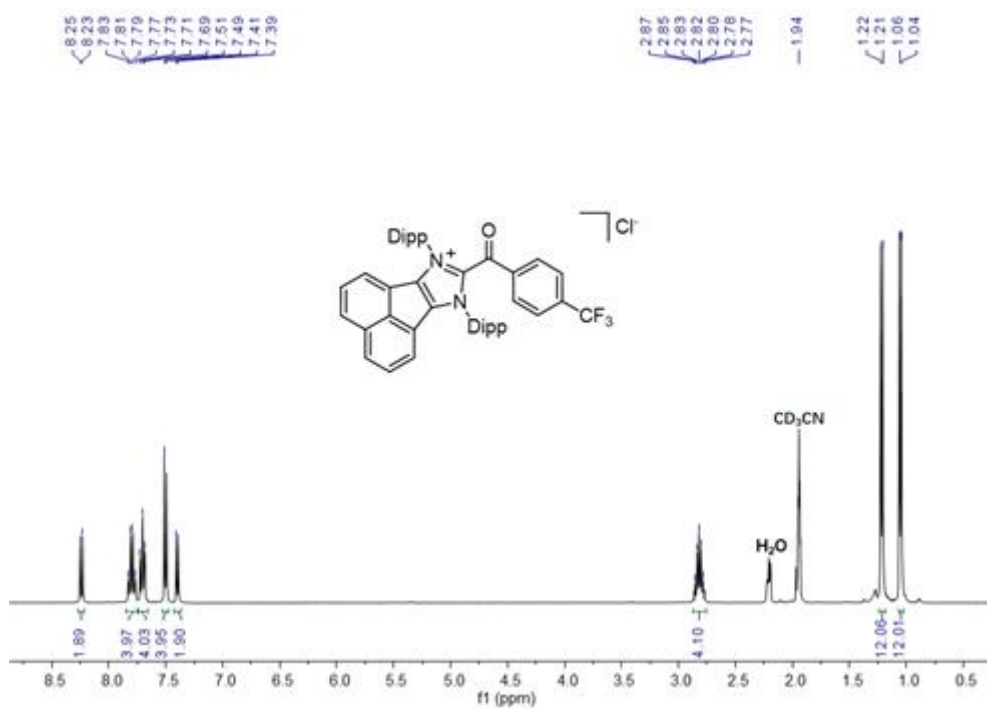

Figure S3.  $^1\text{H}$  NMR spectrum (400 MHz,  $\text{CD}_3\text{CN}$ ) of 2b.

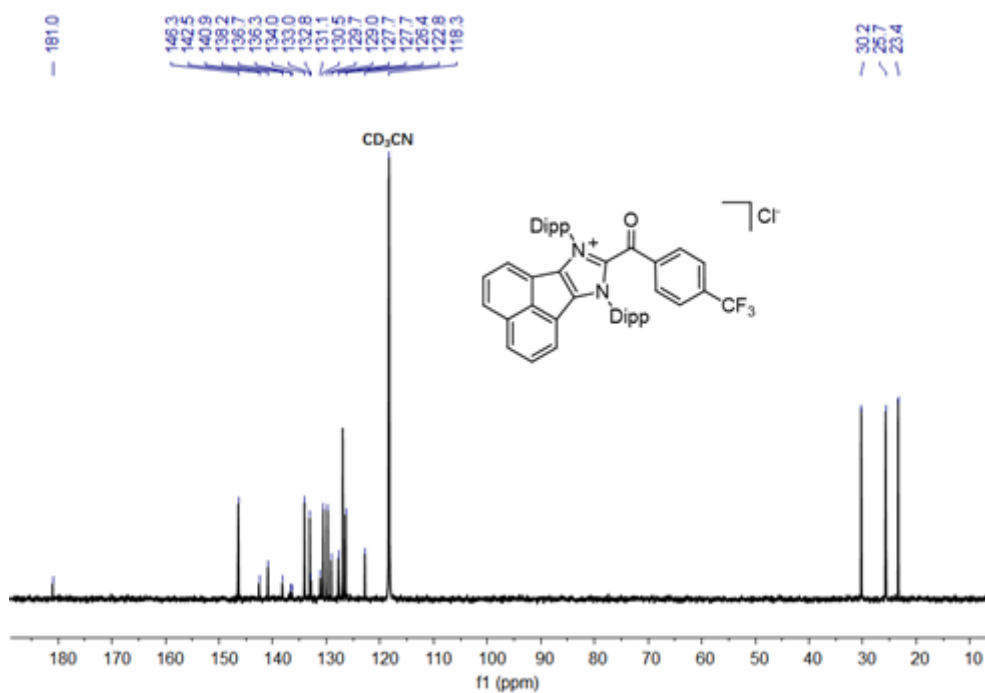

Figure S4.  $^{13}\text{C}\{^1\text{H}\}$  NMR spectrum (100 MHz,  $\text{CD}_3\text{CN}$ ) of **2b**.

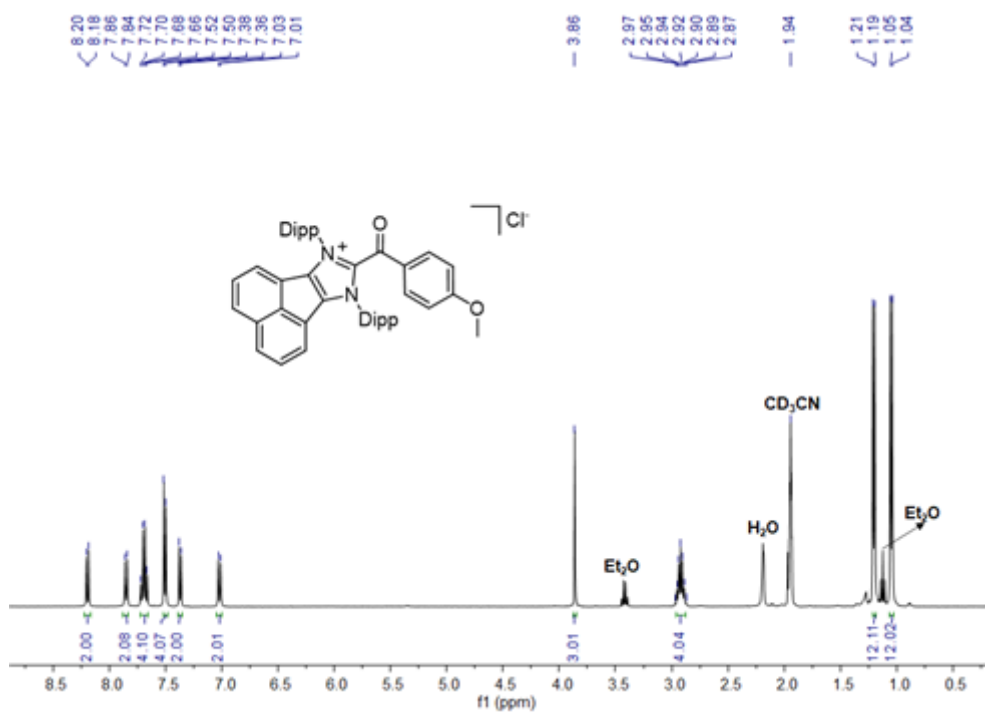

Figure S5.  $^1\text{H}$  NMR spectrum (400 MHz,  $\text{CD}_3\text{CN}$ ) of **2c**.



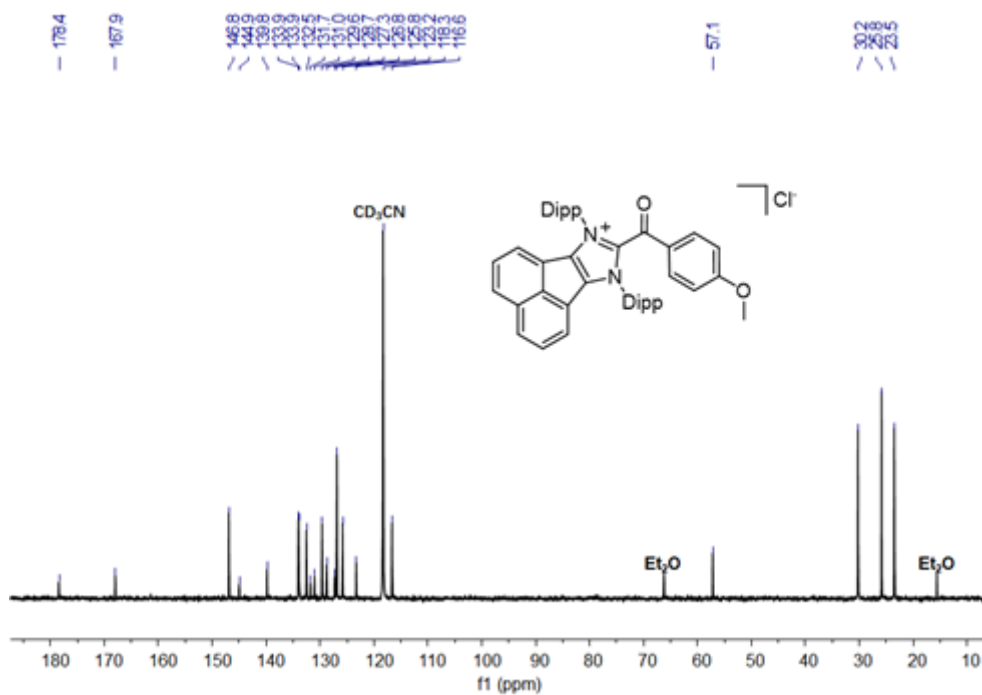

Figure S6.  $^{13}\text{C}\{^1\text{H}\}$  NMR spectrum (100 MHz,  $\text{CD}_3\text{CN}$ ) of 2c.

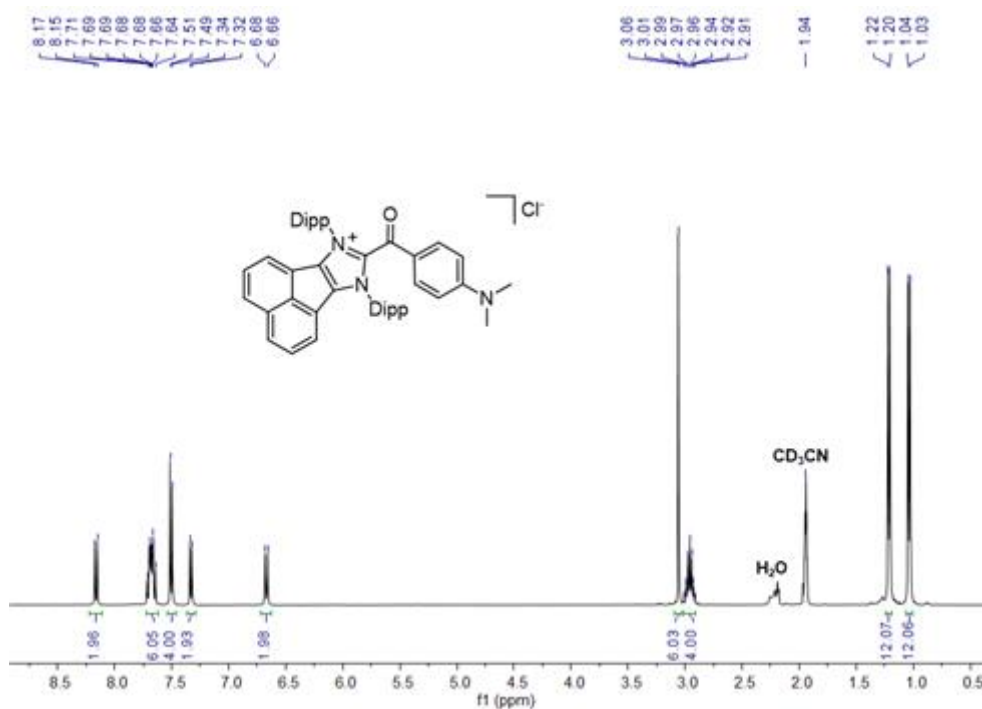

Figure S7.  $^1\text{H}$  NMR spectrum (400 MHz,  $\text{CD}_3\text{CN}$ ) of 2d.

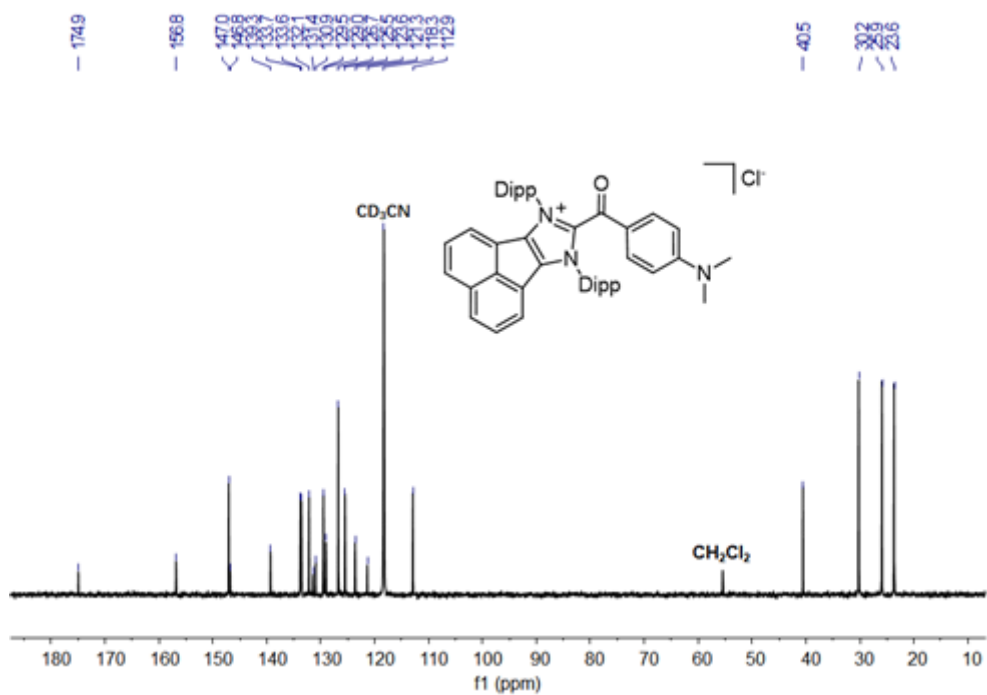

**Figure S8.**  $^{13}\text{C}\{^1\text{H}\}$  NMR spectrum (100 MHz,  $\text{CD}_3\text{CN}$ ) of **2d**.

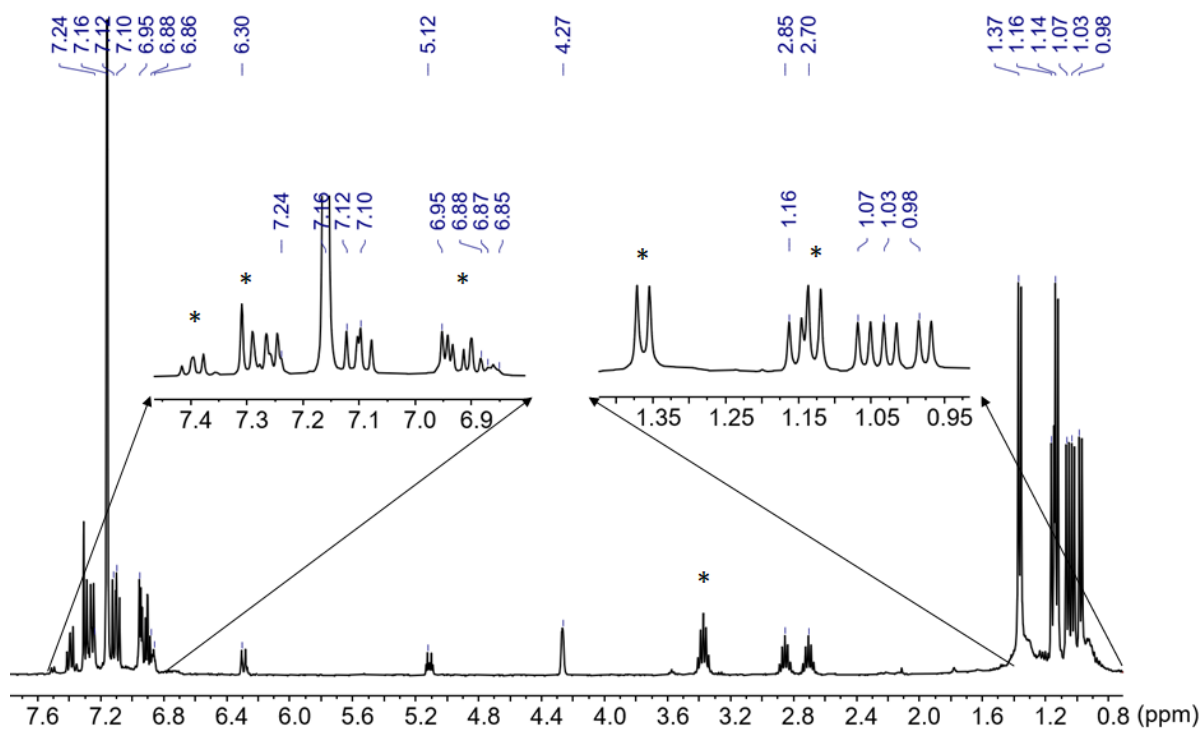

**Figure S9.**  $^1\text{H}$  NMR spectrum (400 MHz,  $\text{C}_6\text{D}_6$ ) of  $[(\mathbf{4a})\text{K}]_2(\text{Et}_2\text{O})_2$ . \* free carbene IPr(BIAN).

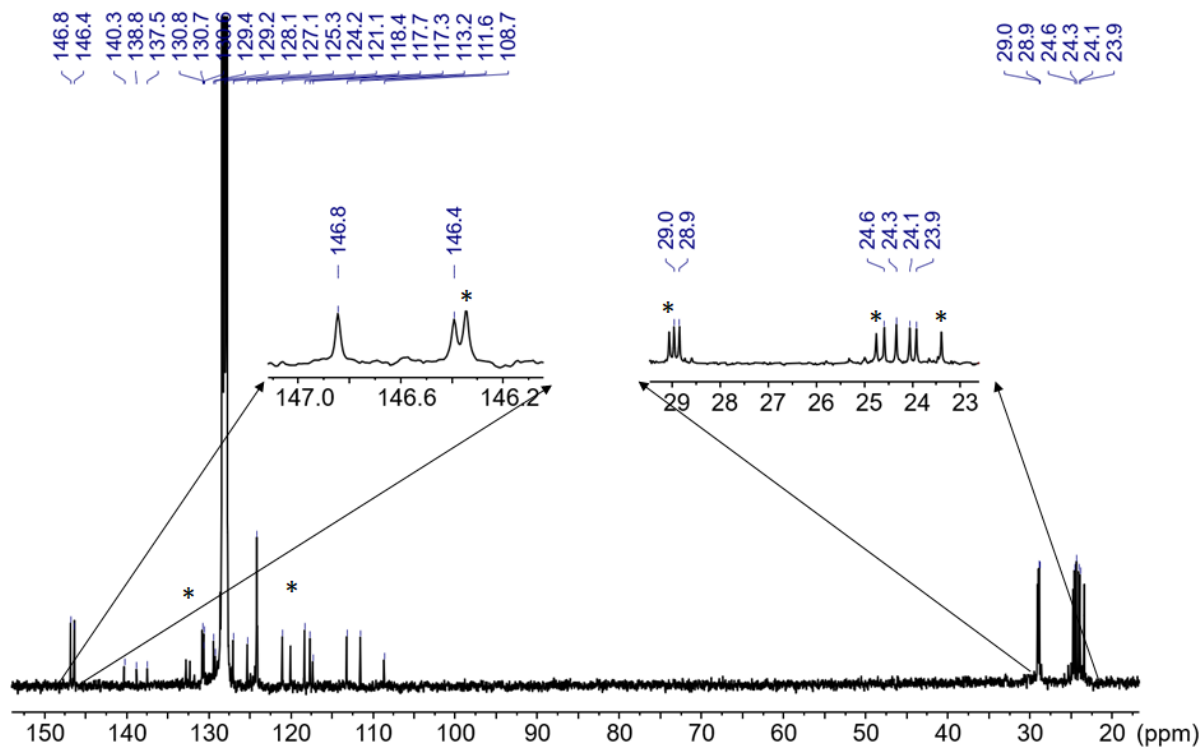

**Figure S10.**  $^{13}\text{C}\{^1\text{H}\}$  NMR spectrum (400 MHz,  $\text{C}_6\text{D}_6$ ) of  $[(4\text{a})\text{K}]_2(\text{Et}_2\text{O})_2$ . \* free carbene IPr(BIAN).

### 3. HRMS spectra

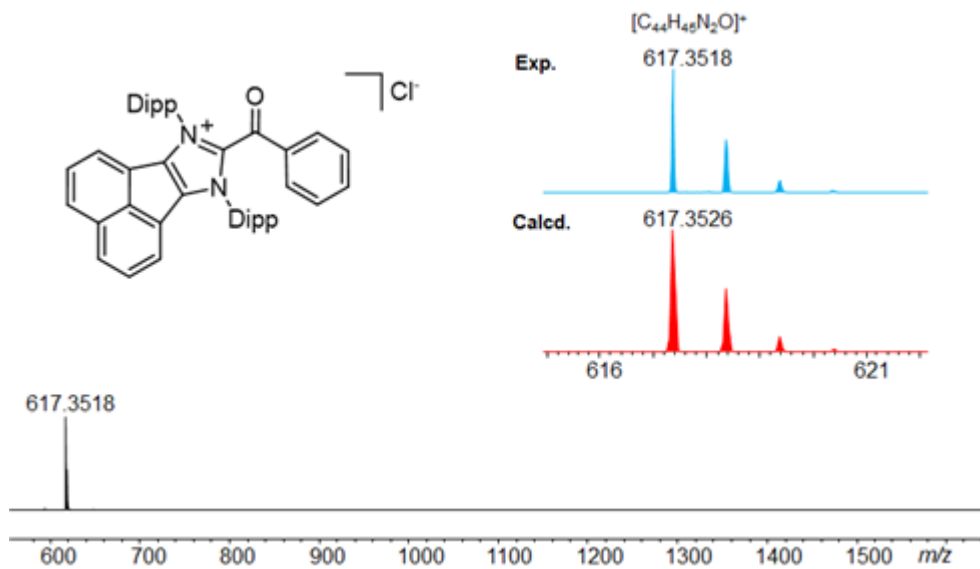

**Figure S11.** The HRMS spectrum of **2a**, inset experimental for (blue) and calculated (red) isotope distributions for peak corresponding to  $[\text{C}_{44}\text{H}_{45}\text{N}_2\text{O}]^+$ .

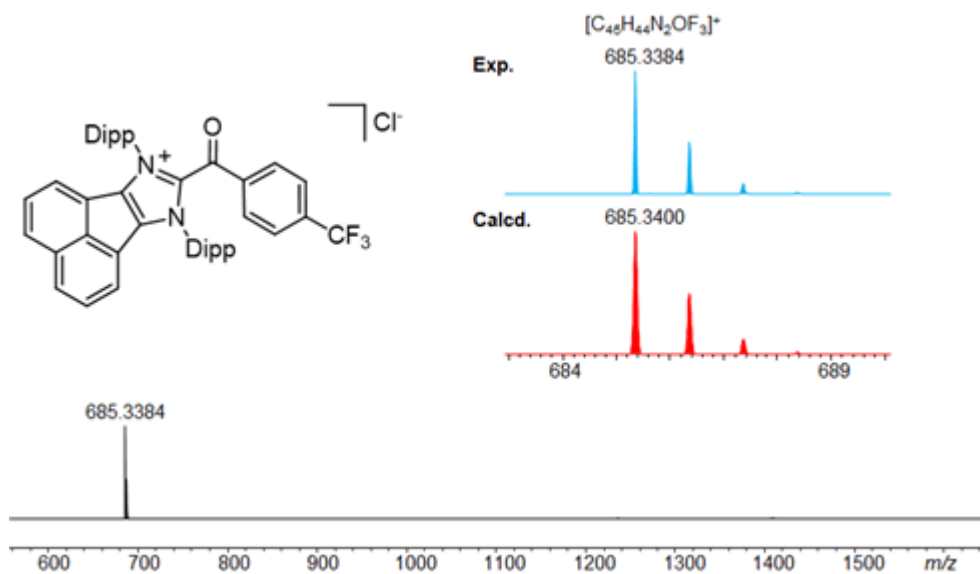

**Figure S12.** The HRMS spectrum of **2b**, inset experimental for (blue) and calculated (red) isotope distributions for peak corresponding to  $[C_{45}H_{44}N_2OF_3]^+$ .

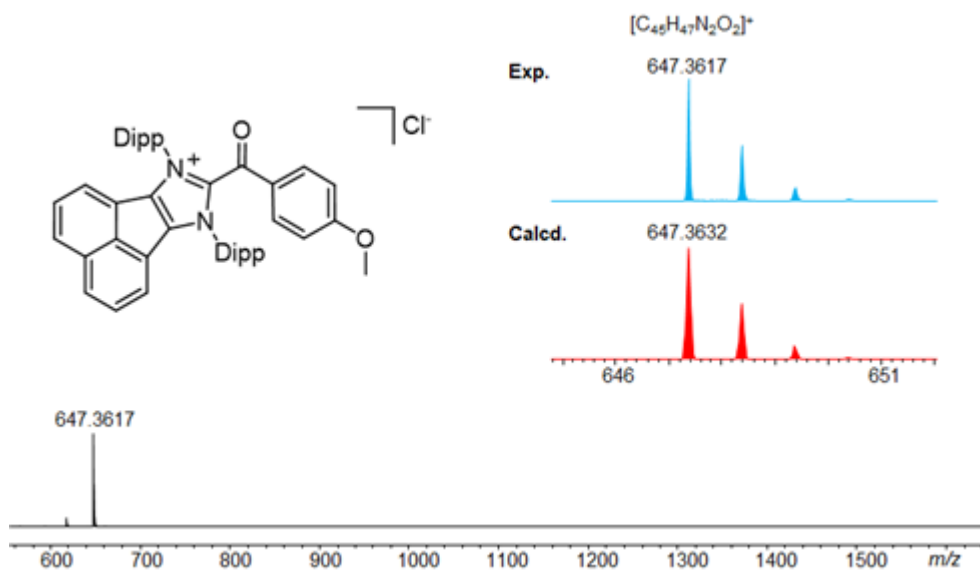

**Figure S13.** The HRMS spectrum of **2c**, inset experimental for (blue) and calculated (red) isotope distributions for peak corresponding to  $[C_{45}H_{47}N_2O_2]^+$ .

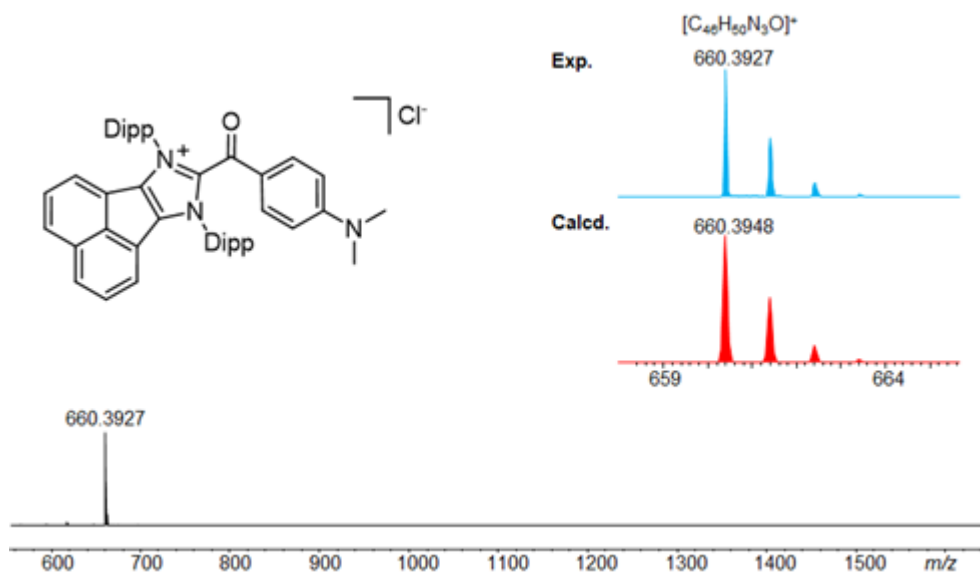

**Figure S14.** The HRMS spectrum of **2d**, inset experimental for (blue) and calculated (red) isotope distributions for peak corresponding to  $[C_{46}H_{50}N_3O]^+$ .

#### 4. Cyclic voltammetry

Cyclic voltammetry (CV) experiments were carried out using a CHI660E electrochemical workstation (CH Instruments, Inc). All experiments were performed in an inert atmosphere of argon glove box at room temperature. A standard three-electrode cell configuration was employed using a glass carbon working electrode, a platinum counter electrode, and a silver wire serving as the reference electrode. The obtained voltammograms were referenced to the  $Fc^+/Fc$  (ferrocenium/ferrocene) redox couple as a standard.

#### 5. X-ray crystallography

Diffraction data of compounds were collected with a Bruker APEX-II CCD diffractometer. Raw data collection and processing were performed with APEX III software package. The data were corrected for absorption using the SADABS program.<sup>5</sup> Using the program Olex2, the structures were solved with the olex2, solve structure solution program using Charge Flipping and refined with the ShelXL refinement package using Least Squares minimization.<sup>6,7</sup> All hydrogen atoms were treated as idealized contributions, and non-hydrogen atoms were refined anisotropically.

**Table S1.** X-Ray crystallographic details of **2a** and **3a**.

|                                                               | <b>2a</b>                                                        | <b>3a</b>                                                        |
|---------------------------------------------------------------|------------------------------------------------------------------|------------------------------------------------------------------|
| Empirical formula                                             | C <sub>44</sub> H <sub>45</sub> ClN <sub>2</sub> O               | C <sub>44</sub> H <sub>45</sub> N <sub>2</sub> O                 |
| Formula weight                                                | 653.27                                                           | 617.82                                                           |
| Radiation / $\lambda$                                         | Mo K $\alpha$ / (0.71073 Å)                                      | Mo K $\alpha$ / (0.71073 Å)                                      |
| Temperature/K                                                 | 200.0                                                            | 210.0                                                            |
| Crystal system                                                | tetragonal                                                       | monoclinic                                                       |
| Space group                                                   | <i>I</i> <sub>4</sub> / <i>m</i>                                 | <i>P</i> 2 <sub>1</sub> / <i>c</i>                               |
| <i>a</i> /Å                                                   | 21.727(6)                                                        | 8.829(3)                                                         |
| <i>b</i> /Å                                                   | 21.727(6)                                                        | 23.340(8)                                                        |
| <i>c</i> /Å                                                   | 17.751(4)                                                        | 17.872(6)                                                        |
| $\alpha$ /°                                                   | 90                                                               | 90                                                               |
| $\beta$ /°                                                    | 90                                                               | 103.175(9)                                                       |
| $\gamma$ /°                                                   | 90                                                               | 90                                                               |
| <i>V</i> /Å <sup>3</sup>                                      | 8380(5)                                                          | 3586(2)                                                          |
| <i>Z</i>                                                      | 8                                                                | 4                                                                |
| <i>P</i> calcg/cm <sup>3</sup>                                | 1.036                                                            | 1.144                                                            |
| $\mu$ /mm <sup>-1</sup>                                       | 0.123                                                            | 0.068                                                            |
| F(000)                                                        | 2784.0                                                           | 1324.0                                                           |
| 2 $\theta$ range for data collection/°                        | 3.75 to 50.806                                                   | 4.682 to 50                                                      |
| Index ranges                                                  | -26 ≤ <i>h</i> ≤ 26, -26 ≤ <i>k</i> ≤ 26,<br>-20 ≤ <i>l</i> ≤ 21 | -10 ≤ <i>h</i> ≤ 10, -21 ≤ <i>k</i> ≤ 27,<br>-20 ≤ <i>l</i> ≤ 21 |
| Independent reflections                                       | 3981 [ <i>R</i> <sub>int</sub> = 0.0905]                         | 6225 [ <i>R</i> <sub>int</sub> = 0.0843]                         |
| Data/restraints/parameters                                    | 3981/0/239                                                       | 6225/21/432                                                      |
| Goodness-of-fit on <i>F</i> <sup>2</sup>                      | 1.102                                                            | 1.036                                                            |
| Final <i>R</i> indexes [ <i>I</i> >= 2 $\sigma$ ( <i>I</i> )] | <i>R</i> <sub>1</sub> = 0.0618, <i>wR</i> <sub>2</sub> = 0.1683  | <i>R</i> <sub>1</sub> = 0.0818, <i>wR</i> <sub>2</sub> = 0.2111  |
| Final <i>R</i> indexes [all data]                             | <i>R</i> <sub>1</sub> = 0.0786, <i>wR</i> <sub>2</sub> = 0.1784  | <i>R</i> <sub>1</sub> = 0.1780, <i>wR</i> <sub>2</sub> = 0.2624  |
| Largest diff. peak/hole / e Å <sup>-3</sup>                   | 0.23/-0.40                                                       | 0.44/-0.27                                                       |
| CCDC                                                          | 2215442                                                          | 2215447                                                          |

**Table S2.** X-Ray crystallographic details of **2b** and **3b**.

|                                                              | <b>2b</b>                                                         | <b>3b</b>                                                        |
|--------------------------------------------------------------|-------------------------------------------------------------------|------------------------------------------------------------------|
| Empirical formula                                            | C <sub>45</sub> H <sub>44</sub> ClF <sub>3</sub> N <sub>2</sub> O | C <sub>45</sub> H <sub>44</sub> F <sub>3</sub> N <sub>2</sub> O  |
| Formula weight                                               | 721.27                                                            | 685.82                                                           |
| Radiation / $\lambda$                                        | Mo K $\alpha$ / (0.71073 Å)                                       | Mo K $\alpha$ / (0.71073 Å)                                      |
| Temperature/K                                                | 190.0                                                             | 210.0                                                            |
| Crystal system                                               | monoclinic                                                        | monoclinic                                                       |
| Space group                                                  | <i>P</i> 2 <sub>1</sub> / <i>c</i>                                | <i>P</i> 2 <sub>1</sub> / <i>c</i>                               |
| <i>a</i> /Å                                                  | 11.4788(3)                                                        | 8.8744(6)                                                        |
| <i>b</i> /Å                                                  | 16.7969(5)                                                        | 24.6056(16)                                                      |
| <i>c</i> /Å                                                  | 20.4525(7)                                                        | 18.0997(11)                                                      |
| $\alpha$ /°                                                  | 90                                                                | 90                                                               |
| $\beta$ /°                                                   | 98.9930(10)                                                       | 103.757(2)                                                       |
| $\gamma$ /°                                                  | 90                                                                | 90                                                               |
| <i>V</i> /Å <sup>3</sup>                                     | 3894.9(2)                                                         | 3838.9(4)                                                        |
| <i>Z</i>                                                     | 4                                                                 | 4                                                                |
| <i>P</i> calcg/cm <sup>3</sup>                               | 1.230                                                             | 1.187                                                            |
| $\mu$ /mm <sup>-1</sup>                                      | 0.149                                                             | 0.080                                                            |
| F(000)                                                       | 1520.0                                                            | 1452.0                                                           |
| 2 $\theta$ range for data collection/°                       | 3.592 to 52.712                                                   | 4.726 to 52.706                                                  |
| Index ranges                                                 | -14 ≤ <i>h</i> ≤ 13, -20 ≤ <i>k</i> ≤ 20,<br>-25 ≤ <i>l</i> ≤ 25  | -10 ≤ <i>h</i> ≤ 11, -30 ≤ <i>k</i> ≤ 30,<br>-22 ≤ <i>l</i> ≤ 22 |
| Independent reflections                                      | 7935 [ <i>R</i> <sub>int</sub> = 0.0331]                          | 7810 [ <i>R</i> <sub>int</sub> = 0.0412]                         |
| Data/restraints/parameters                                   | 7935/114/477                                                      | 7810/0/468                                                       |
| Goodness-of-fit on <i>F</i> <sup>2</sup>                     | 1.049                                                             | 1.029                                                            |
| Final <i>R</i> indexes [ <i>I</i> ≥ 2 $\sigma$ ( <i>I</i> )] | <i>R</i> <sub>1</sub> = 0.0763, <i>wR</i> <sub>2</sub> = 0.2177   | <i>R</i> <sub>1</sub> = 0.0742, <i>wR</i> <sub>2</sub> = 0.2113  |
| Final <i>R</i> indexes [all data]                            | <i>R</i> <sub>1</sub> = 0.0964, <i>wR</i> <sub>2</sub> = 0.2378   | <i>R</i> <sub>1</sub> = 0.1128, <i>wR</i> <sub>2</sub> = 0.2414  |
| Largest diff. peak/hole / e Å <sup>-3</sup>                  | 1.35/-0.78                                                        | 0.45/-0.39                                                       |
| CCDC                                                         | 2215443                                                           | 2215448                                                          |

**Table S3.** X-Ray crystallographic details of **2c** and **3c**.

|                                                              | <b>2c</b>                                                                                        | <b>3c</b>                                                        |
|--------------------------------------------------------------|--------------------------------------------------------------------------------------------------|------------------------------------------------------------------|
| Empirical formula                                            | C <sub>45</sub> H <sub>47</sub> ClN <sub>2</sub> O <sub>2</sub> ·CH <sub>2</sub> Cl <sub>2</sub> | C <sub>45</sub> H <sub>47</sub> N <sub>2</sub> O <sub>2</sub>    |
| Formula weight                                               | 768.22                                                                                           | 647.84                                                           |
| Radiation / $\lambda$                                        | Mo K $\alpha$ / (0.71073 Å)                                                                      | Mo K $\alpha$ / (0.71073 Å)                                      |
| Temperature/K                                                | 190.0                                                                                            | 214.0                                                            |
| Crystal system                                               | monoclinic                                                                                       | monoclinic                                                       |
| Space group                                                  | <i>C2/m</i>                                                                                      | <i>P2<sub>1</sub>/c</i>                                          |
| <i>a</i> /Å                                                  | 13.1041(7)                                                                                       | 8.8133(8)                                                        |
| <i>b</i> /Å                                                  | 18.4405(9)                                                                                       | 24.708(3)                                                        |
| <i>c</i> /Å                                                  | 18.7136(8)                                                                                       | 18.0295(19)                                                      |
| $\alpha$ /°                                                  | 90                                                                                               | 90                                                               |
| $\beta$ /°                                                   | 102.261(2)                                                                                       | 103.983(3)                                                       |
| $\gamma$ /°                                                  | 90                                                                                               | 90                                                               |
| <i>V</i> /Å <sup>3</sup>                                     | 4418.9(4)                                                                                        | 3809.8(7)                                                        |
| <i>Z</i>                                                     | 4                                                                                                | 4                                                                |
| <i>P</i> calcg/cm <sup>3</sup>                               | 1.219                                                                                            | 1.129                                                            |
| $\mu$ /mm <sup>-1</sup>                                      | 0.306                                                                                            | 0.068                                                            |
| F(000)                                                       | 1708.0                                                                                           | 1388.0                                                           |
| 2 $\theta$ range for data collection/°                       | 3.872 to 52.752                                                                                  | 4.762 to 50.638                                                  |
| Index ranges                                                 | -14 ≤ <i>h</i> ≤ 16, -23 ≤ <i>k</i> ≤ 22,<br>-23 ≤ <i>l</i> ≤ 23                                 | -10 ≤ <i>h</i> ≤ 10, -29 ≤ <i>k</i> ≤ 25,<br>-21 ≤ <i>l</i> ≤ 21 |
| Independent reflections                                      | 4633 [ <i>R</i> <sub>int</sub> = 0.0268]                                                         | 6873 [ <i>R</i> <sub>int</sub> = 0.0764]                         |
| Data/restraints/parameters                                   | 4633/16/285                                                                                      | 6873/0/451                                                       |
| Goodness-of-fit on <i>F</i> <sup>2</sup>                     | 1.058                                                                                            | 1.020                                                            |
| Final <i>R</i> indexes [ <i>I</i> ≥ 2 $\sigma$ ( <i>I</i> )] | <i>R</i> <sub>1</sub> = 0.0914, <i>wR</i> <sub>2</sub> = 0.2791                                  | <i>R</i> <sub>1</sub> = 0.0712, <i>wR</i> <sub>2</sub> = 0.1668  |
| Final <i>R</i> indexes [all data]                            | <i>R</i> <sub>1</sub> = 0.1038, <i>wR</i> <sub>2</sub> = 0.2948                                  | <i>R</i> <sub>1</sub> = 0.1465, <i>wR</i> <sub>2</sub> = 0.2036  |
| Largest diff. peak/hole / e Å <sup>-3</sup>                  | 1.12/-0.79                                                                                       | 0.37/-0.31                                                       |
| CCDC                                                         | 2215446                                                                                          | 2215449                                                          |



**Table S4.** X-Ray crystallographic details of **2d** and **3d**.

|                                                              | <b>2d</b>                                                               | <b>3d</b>                                                        |
|--------------------------------------------------------------|-------------------------------------------------------------------------|------------------------------------------------------------------|
| Empirical formula                                            | C <sub>46</sub> H <sub>50</sub> ClN <sub>3</sub> O·1.5Et <sub>2</sub> O | C <sub>46</sub> H <sub>50</sub> N <sub>3</sub> O                 |
| Formula weight                                               | 897.52                                                                  | 660.89                                                           |
| Radiation / $\lambda$                                        | Ga K $\alpha$ / (1.34139 Å)                                             | Ga K $\alpha$ / (1.34139 Å)                                      |
| Temperature/K                                                | 90                                                                      | 190.0                                                            |
| Crystal system                                               | orthorhombic                                                            | triclinic                                                        |
| Space group                                                  | <i>Pbcn</i>                                                             | <i>P</i> $\bar{1}$                                               |
| <i>a</i> /Å                                                  | 18.5634(19)                                                             | 8.7055(3)                                                        |
| <i>b</i> /Å                                                  | 23.410(2)                                                               | 9.3964(3)                                                        |
| <i>c</i> /Å                                                  | 21.513(2)                                                               | 23.6914(7)                                                       |
| $\alpha$ /°                                                  | 90                                                                      | 87.6640(10)                                                      |
| $\beta$ /°                                                   | 90                                                                      | 82.0200(10)                                                      |
| $\gamma$ /°                                                  | 90                                                                      | 77.0010(10)                                                      |
| <i>V</i> /Å <sup>3</sup>                                     | 9349.1(16)                                                              | 1869.93(10)                                                      |
| <i>Z</i>                                                     | 8                                                                       | 2                                                                |
| <i>P</i> calcg/cm <sup>3</sup>                               | 1.147                                                                   | 1.174                                                            |
| $\mu$ /mm <sup>-1</sup>                                      | 0.680                                                                   | 0.344                                                            |
| F(000)                                                       | 3480.0                                                                  | 710.0                                                            |
| 2 $\theta$ range for data collection/°                       | 6.382 to 108.442                                                        | 8.99 to 118.406                                                  |
| Index ranges                                                 | -20 ≤ <i>h</i> ≤ 21, -20 ≤ <i>k</i> ≤ 28,<br>-23 ≤ <i>l</i> ≤ 25        | -11 ≤ <i>h</i> ≤ 11, -11 ≤ <i>k</i> ≤ 12,<br>-29 ≤ <i>l</i> ≤ 30 |
| Independent reflections                                      | 8260 [ <i>R</i> <sub>int</sub> = 0.0676]                                | 8134 [ <i>R</i> <sub>int</sub> = 0.0429]                         |
| Data/restraints/parameters                                   | 8260/69/541                                                             | 8134/0/461                                                       |
| Goodness-of-fit on <i>F</i> <sup>2</sup>                     | 1.052                                                                   | 1.069                                                            |
| Final <i>R</i> indexes [ <i>I</i> ≥ 2 $\sigma$ ( <i>I</i> )] | <i>R</i> <sub>1</sub> = 0.0538, <i>wR</i> <sub>2</sub> = 0.1410         | <i>R</i> <sub>1</sub> = 0.0440, <i>wR</i> <sub>2</sub> = 0.1112  |
| Final <i>R</i> indexes [all data]                            | <i>R</i> <sub>1</sub> = 0.0637, <i>wR</i> <sub>2</sub> = 0.1491         | <i>R</i> <sub>1</sub> = 0.0591, <i>wR</i> <sub>2</sub> = 0.1186  |
| Largest diff. peak/hole / e Å <sup>-3</sup>                  | 0.40/-0.52                                                              | 0.24/-0.20                                                       |
| CCDC                                                         | 2215445                                                                 | 2215450                                                          |

**Table S5.** X-Ray crystallographic details of [(4a)K]<sub>2</sub>(Et<sub>2</sub>O)<sub>2</sub>.

|                                                | [(4a)K] <sub>2</sub> (Et <sub>2</sub> O) <sub>2</sub>                         |
|------------------------------------------------|-------------------------------------------------------------------------------|
| Empirical formula                              | C <sub>96</sub> H <sub>110</sub> K <sub>2</sub> N <sub>4</sub> O <sub>4</sub> |
| Formula weight                                 | 731.04                                                                        |
| Radiation / $\lambda$                          | Mo K $\alpha$ / (0.71073 Å)                                                   |
| Temperature/K                                  | 220                                                                           |
| Crystal system                                 | triclinic                                                                     |
| Space group                                    | $P\bar{1}$                                                                    |
| $a/\text{Å}$                                   | 13.059(5)                                                                     |
| $b/\text{Å}$                                   | 13.426(5)                                                                     |
| $c/\text{Å}$                                   | 14.496(5)                                                                     |
| $\alpha/^\circ$                                | 65.992(9)                                                                     |
| $\beta/^\circ$                                 | 68.215(9)                                                                     |
| $\gamma/^\circ$                                | 69.891(9)                                                                     |
| $V/\text{Å}^3$                                 | 2099.4(13)                                                                    |
| $Z$                                            | 2                                                                             |
| $\rho$ calcg/cm <sup>3</sup>                   | 1.156                                                                         |
| $\mu/\text{mm}^{-1}$                           | 0.166                                                                         |
| F(000)                                         | 784.0                                                                         |
| 2 $\theta$ range for data collection/ $^\circ$ | 4.02 to 49.796                                                                |
| Index ranges                                   | -15 $\leq$ h $\leq$ 15, -15 $\leq$ k $\leq$ 15,<br>-17 $\leq$ l $\leq$ 16     |
| Independent reflections                        | 7021 [ $R_{\text{int}} = 0.0905$ ]                                            |
| Data/restraints/parameters                     | 7021/3/464                                                                    |
| Goodness-of-fit on $F^2$                       | 1.025                                                                         |
| Final $R$ indexes [ $I \geq 2\sigma(I)$ ]      | $R_1 = 0.0964$ , $wR_2 = 0.2723$                                              |
| Final $R$ indexes [all data]                   | $R_1 = 0.1801$ , $wR_2 = 0.3364$                                              |
| Largest diff. peak/hole / e Å <sup>-3</sup>    | 0.34/-0.30                                                                    |
| CCDC                                           | 2268433                                                                       |

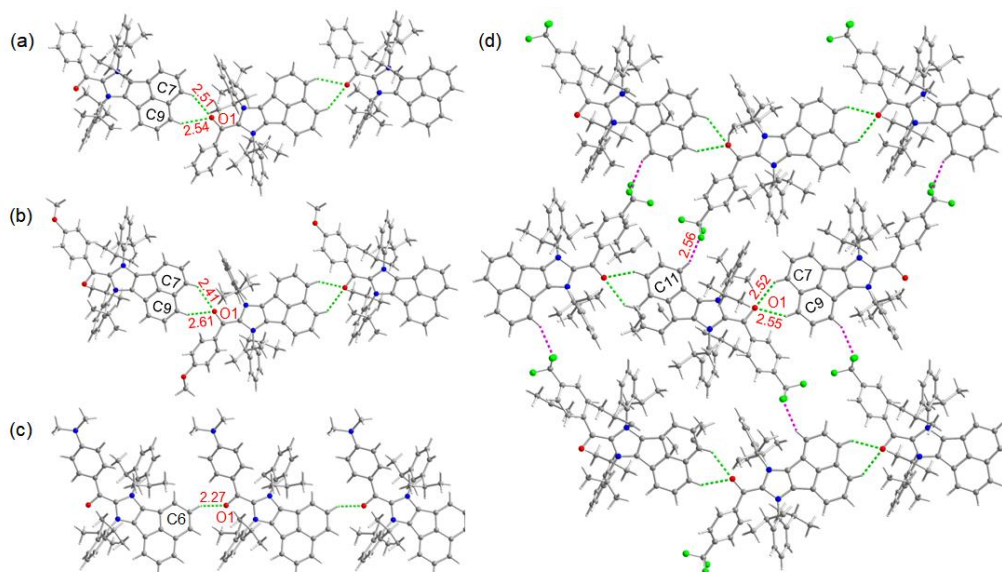

**Figure S15.** The packing structure of radicals **3a** (a), **3c** (b), **3d** (c), and **3b** (d). The green dashed line behalf C–H···O hydrogen bond, and the purple dashed line behalf C–H···F hydrogen. Color code: C, gray; N, blue; O, red; F, green; H, white.

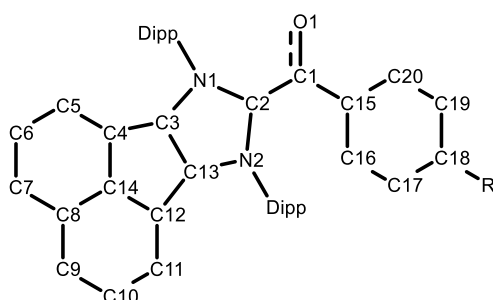

**Table S6.** Hydrogen bond lengths (Å) and angles (°) for **3a–d**.

|                                                                | D   | H   | A               | d(D-H)/Å | d(H-A)/Å | d(D-A)/Å | D-H-A/° |
|----------------------------------------------------------------|-----|-----|-----------------|----------|----------|----------|---------|
| <b>3a</b>                                                      | C7  | H7  | O1 <sup>1</sup> | 0.94     | 2.51     | 3.325(6) | 144.8   |
|                                                                | C9  | H9  | O1 <sup>2</sup> | 0.94     | 2.54     | 3.347(6) | 143.9   |
| <sup>1</sup> 1-X, 1/2-Y, 1/2+Z                                 |     |     |                 |          |          |          |         |
| <b>3b</b>                                                      | C7  | H7  | O1 <sup>1</sup> | 0.94     | 2.55     | 3.343(4) | 141.8   |
|                                                                | C9  | H9  | O1 <sup>1</sup> | 0.94     | 2.52     | 3.317(4) | 142.5   |
|                                                                | C11 | H11 | F1 <sup>2</sup> | 0.94     | 2.56     | 3.431(4) | 153.8   |
| <sup>1</sup> 1+X, 3/2-Y, 1/2+Z; <sup>2</sup> 1-X, 1/2+Y, 3/2+Z |     |     |                 |          |          |          |         |
| <b>3c</b>                                                      | C7  | H7  | O1 <sup>1</sup> | 0.94     | 2.61     | 3.372(4) | 138.3   |
|                                                                | C9  | H9  | O1 <sup>1</sup> | 0.94     | 2.41     | 3.221(4) | 144.9   |
| <sup>1</sup> 1-X, 1/2-Y, 1/2+Z                                 |     |     |                 |          |          |          |         |
| <b>3d</b>                                                      | C6  | H6  | O1 <sup>1</sup> | 0.95     | 2.27     | 3.107(2) | 146.3   |
| <sup>1</sup> 1+X, 1+Y, +Z                                      |     |     |                 |          |          |          |         |

## 6. EPR spectra

The continuous wave (CW) EPR spectra were obtained using an X-band Bruker E500 spectrometer at room temperature. The microwave frequency was 9.8 GHz, and the modulation amplitude was 0.1 mT. Simulations of the EPR spectra have been performed with Easyspin v5.2.11.<sup>8</sup>

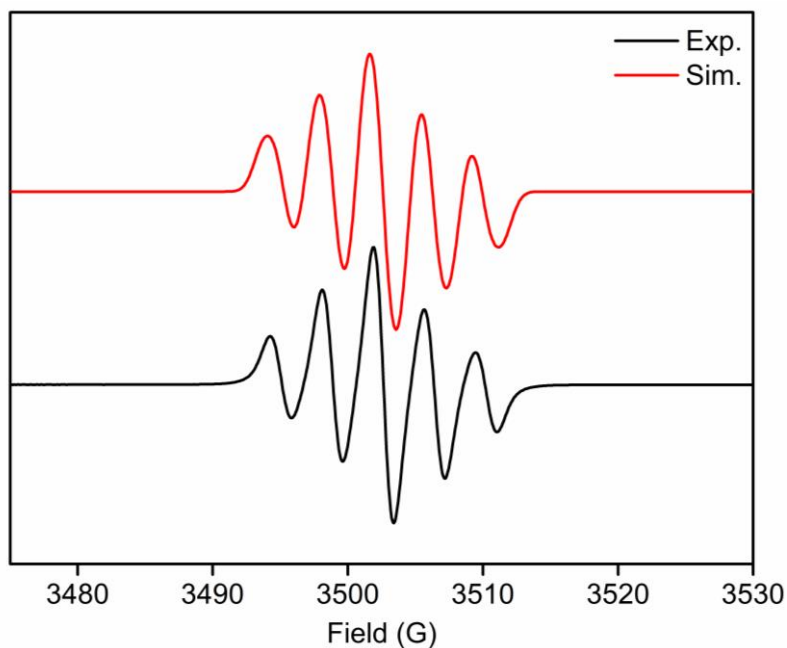

**Figure S16.** X-Band EPR spectrum of **3a** in THF.  $g = 2.0044$ , hyperfine coupling constants:  $A_{\text{iso}}(^{14}\text{N}) = 3.82$ , 3.78 MHz, line broadening: 0.154.

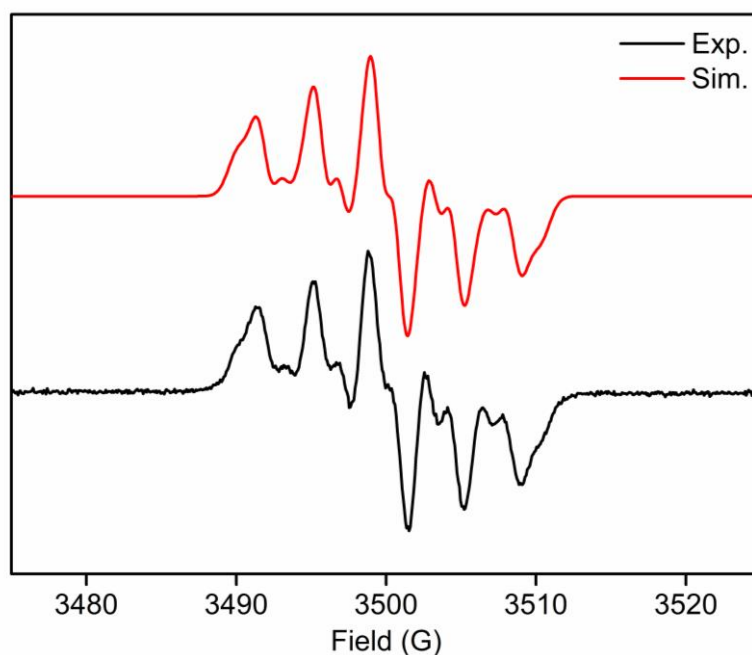

**Figure S17.** X-Band EPR spectrum of **3b** in THF.  $g = 2.0047$ , hyperfine coupling constants:  $A_{\text{iso}}(^{14}\text{N}) = 3.80$ , 3.77 MHz,  $A_{\text{iso}}(^{19}\text{F}) = 1.23$  MHz, line broadening: 0.166.

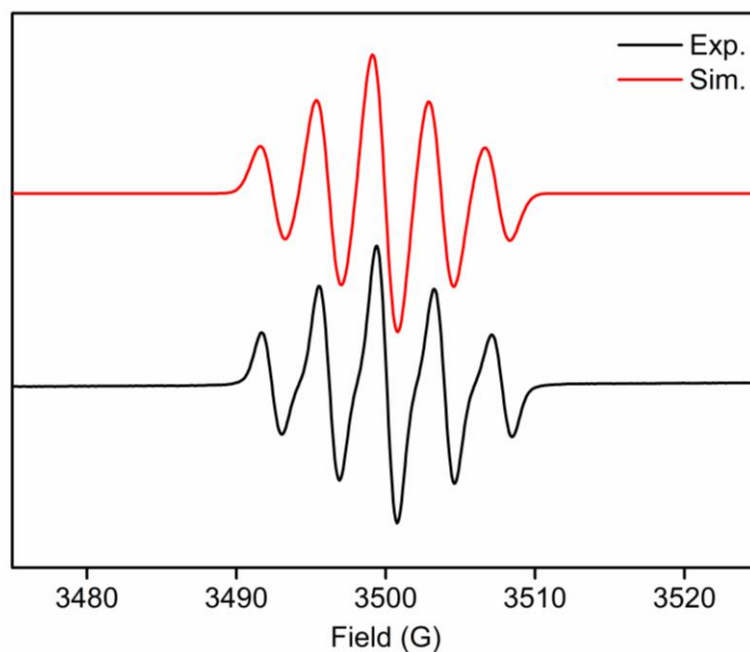

**Figure S18.** X-Band EPR spectrum of **3c** in THF.  $g = 2.0046$ , hyperfine coupling constants:  $A_{\text{iso}}(^{14}\text{N}) = 3.83$ , 3.78 MHz, line broadening: 0.158.

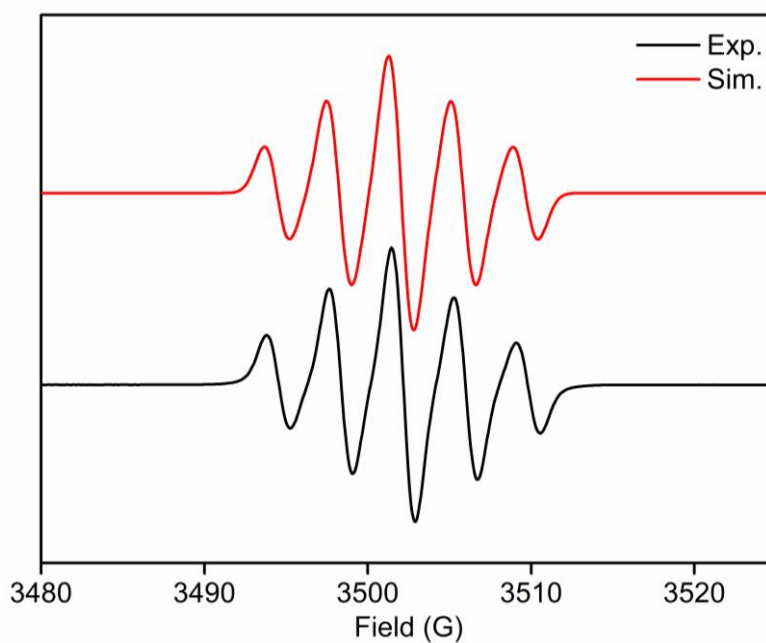

**Figure S19.** X-Band EPR spectrum of **3d** in THF.  $g = 2.0043$ , hyperfine coupling constants:  $A_{\text{iso}}(^{14}\text{N}) = 3.85$ , 3.75 MHz, line broadening: 0.151.

## 7. Computational details

All calculations were performed with the Gaussian(R) 09 program optimizer.<sup>9</sup> The theoretical approach is based on the density functional theory (DFT) framework.<sup>10,11</sup> The geometry optimizations of radicals **3a–d** were calculated at the UB3LYP/6-311G\*\* level of theory using the crystal structure coordinate of **3a–d**

as the starting model, respectively. The geometry optimizations of  $4a^-$  were calculated at the B3LYP-D3-(BJ)/def2-SVP level of theory. Frequency analysis was performed to verify the stationary state geometry. In all cases no imaginary frequency was found. Wiberg bond indices (WBIs) were calculated from the optimized geometry with Löwdin orthogonalization method using Multiwfn. Time-dependent density functional theory (TD-DFT) was employed to calculate excitation energies. We used the functional B3LYP in combination the def2-TZVP basis sets. The solvent DMF was described in this case by the conductor-like polarizable continuum model, CPCM.

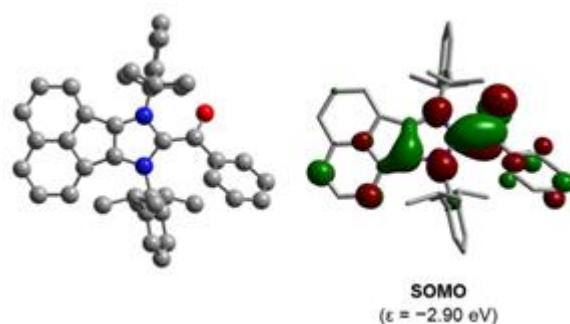

**Figure S20.** Optimized structure at the UB3LYP/6-311G\*\* level of theory for **3a** (left) and the shape of SOMO and eigenvalues (eV) at the UB3LYP/6-311G\*\* level of theory for **3a** (right). Hydrogen atoms have been omitted for clarity.

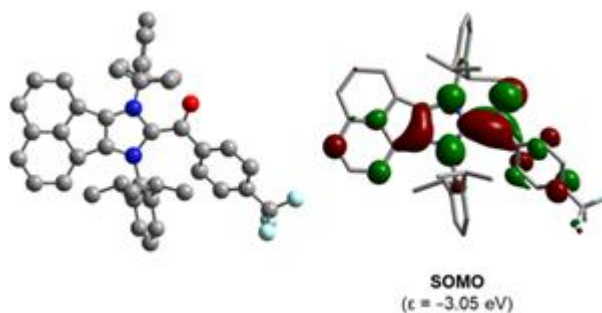

**Figure S21.** Optimized structure at the UB3LYP/6-311G\*\* level of theory for **3b** (left) and the shape of SOMO and eigenvalues (eV) at the UB3LYP/6-311G\*\* level of theory for **3b** (right). Hydrogen atoms have been omitted for clarity.

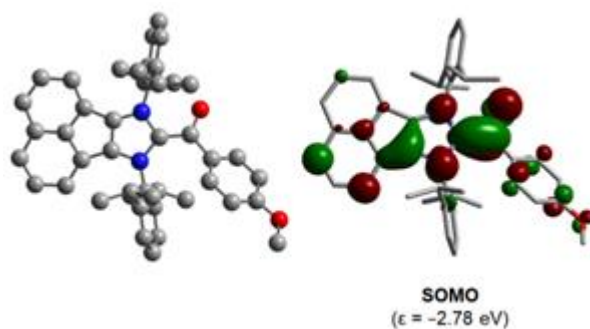

**Figure S22.** Optimized structure at the UB3LYP/6-311G\*\* level of theory for **3c** (left) and the shape of SOMO and eigenvalues (eV) at the UB3LYP/6-311G\*\* level of theory for **3c** (right). Hydrogen atoms have been omitted for clarity.

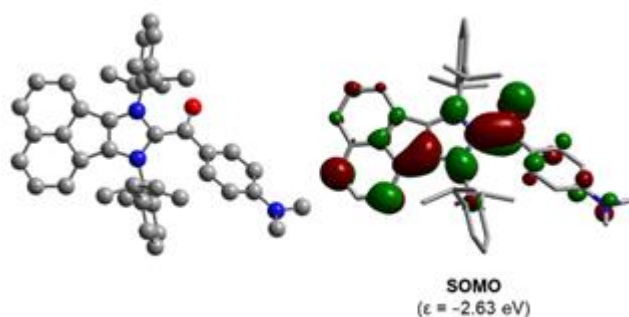

**Figure S23.** Optimized structure at the UB3LYP/6-311G\*\* level of theory for **3d** (left) and the shape of SOMO and eigenvalues (eV) at the UB3LYP/6-311G\*\* level of theory for **3d** (right). Hydrogen atoms have been omitted for clarity.

## 8. UV-vis spectra

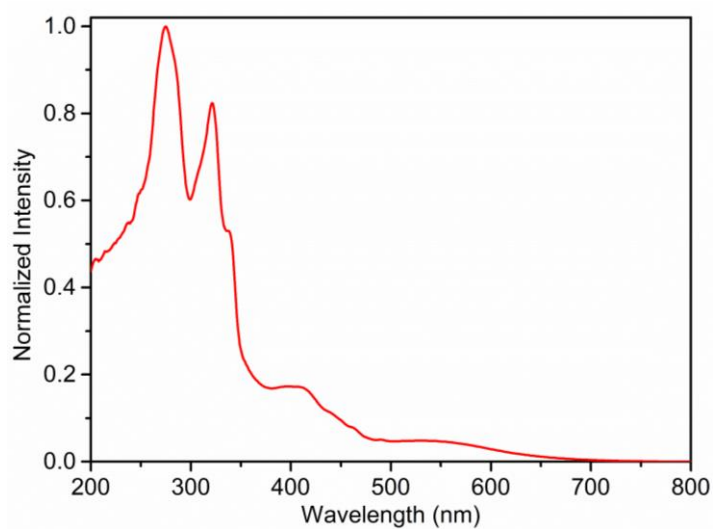

**Figure S24.** UV-vis spectrum of **3a** in DMF at room temperature ( $c = 10^{-5}$  M).

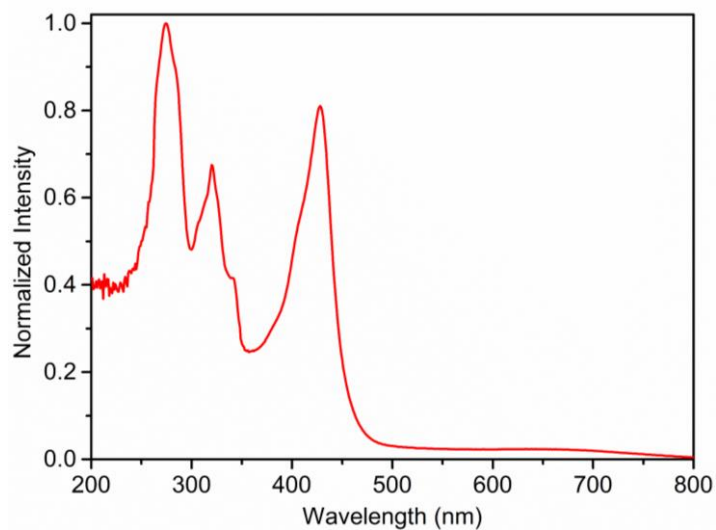

**Figure S25.** UV-vis spectrum of **3b** in DMF at room temperature ( $c = 10^{-5}$  M).

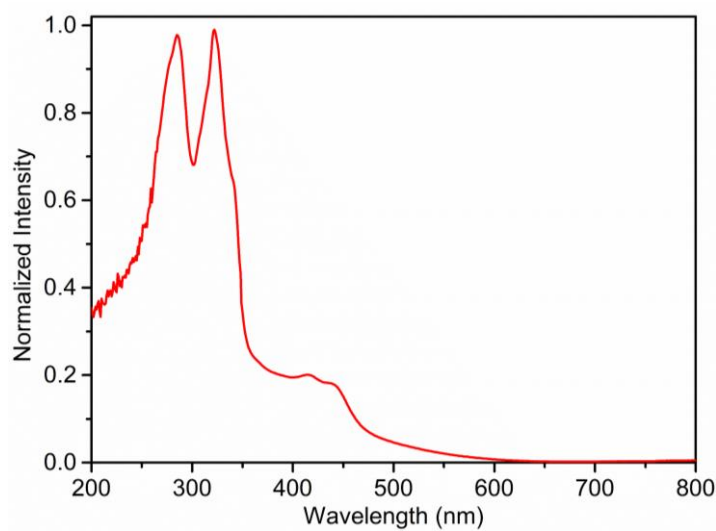

**Figure S26.** UV-vis spectrum of **3c** in DMF at room temperature ( $c = 10^{-5}$  M).

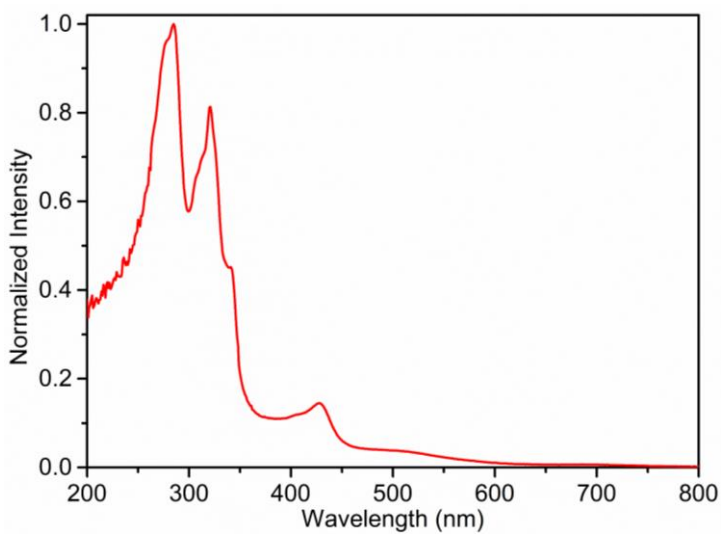

**Figure S27.** UV-vis spectrum of **3d** in DMF at room temperature ( $c = 10^{-5}$  M).



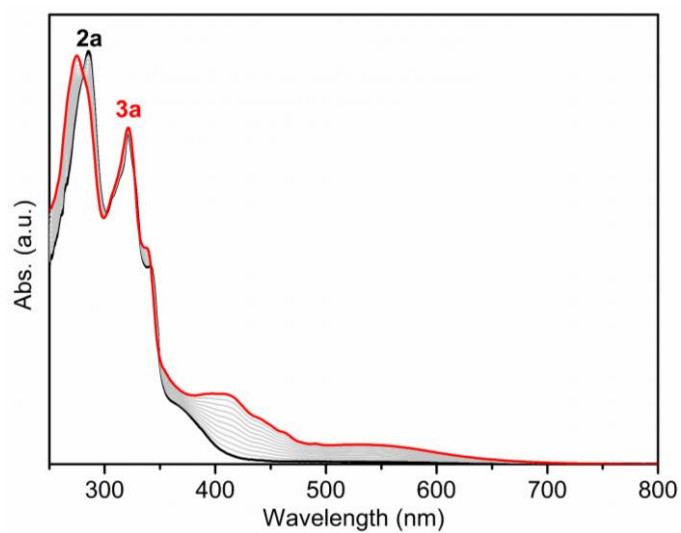

**Figure S28.** Spectroelectrochemistry of **2a** in DMF ( $c = 10^{-5}$  M). Experiment performed with Pt working electrode, Pt wire counter electrode and Ag wire reference electrode with 0.1 M  $\text{NBu}_4\text{PF}_6$  electrolyte.

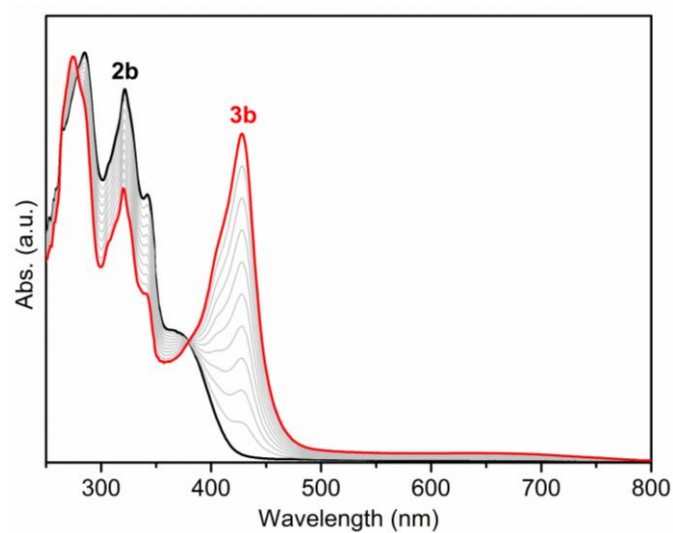

**Figure S29.** Spectroelectrochemistry of **2b** in DMF ( $c = 10^{-5}$  M). Experiment performed with Pt working electrode, Pt wire counter electrode and Ag wire reference electrode with 0.1 M  $\text{NBu}_4\text{PF}_6$  electrolyte.

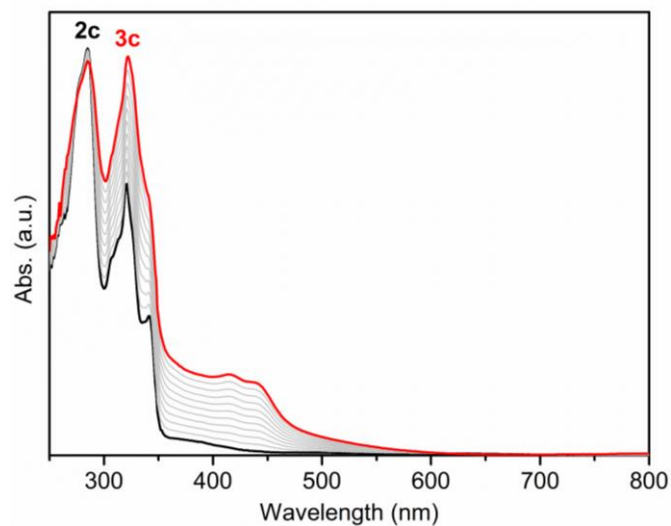

**Figure S30.** Spectroelectrochemistry of **2c** in DMF ( $c = 10^{-5}$  M). Experiment performed with Pt working electrode, Pt wire counter electrode and Ag wire reference electrode with 0.1 M NBu<sub>4</sub>PF<sub>6</sub> electrolyte.

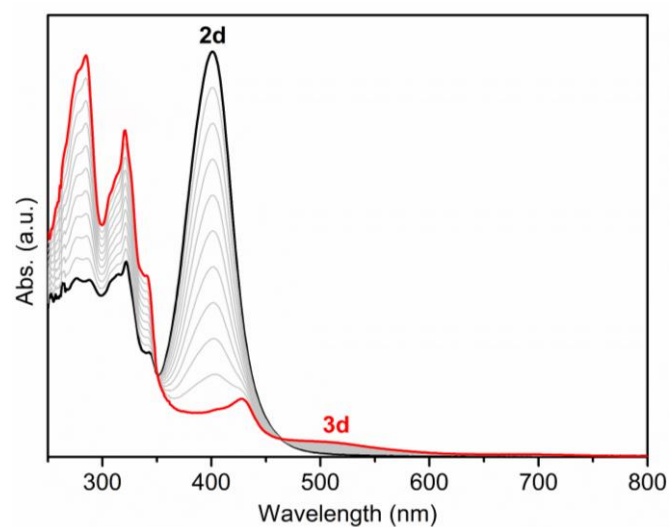

**Figure S31.** Spectroelectrochemistry of **2d** in DMF ( $c = 10^{-5}$  M). Experiment performed with Pt working electrode, Pt wire counter electrode and Ag wire reference electrode with 0.1 M NBu<sub>4</sub>PF<sub>6</sub> electrolyte.

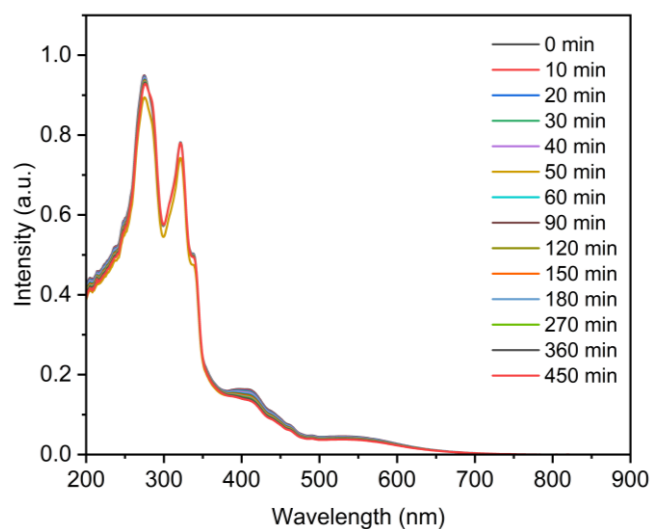

**Figure S32.** Decays of UV-vis spectra of **3a** ( $\lambda = 395$  nm) in DMF ( $c = 10^{-5}$  M).

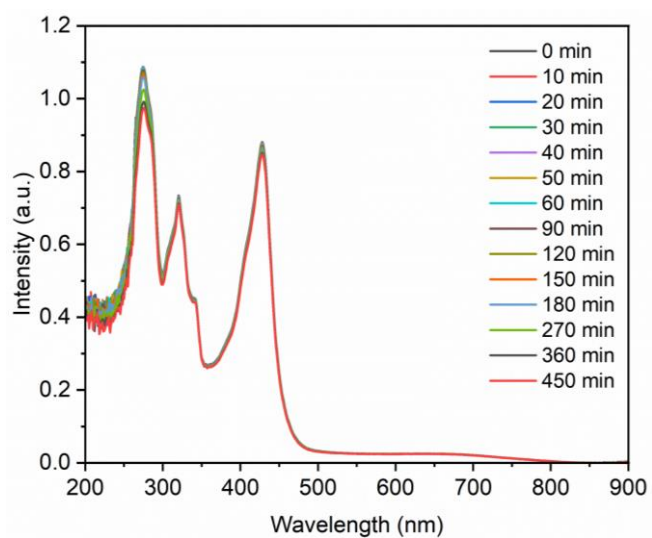

**Figure S33.** Decays of UV-vis spectra of **3b** ( $\lambda = 428$  nm) in DMF ( $c = 10^{-5}$  M).

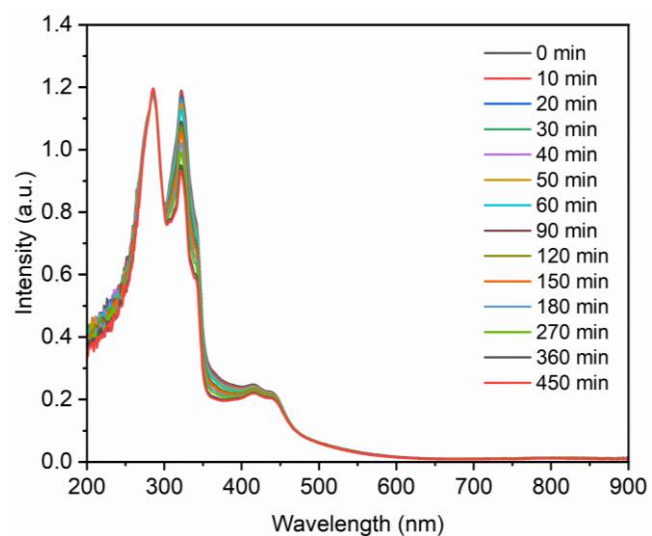

**Figure S34.** Decays of UV-vis spectra of **3c** ( $\lambda = 440$  nm) in DMF ( $c = 10^{-5}$  M).

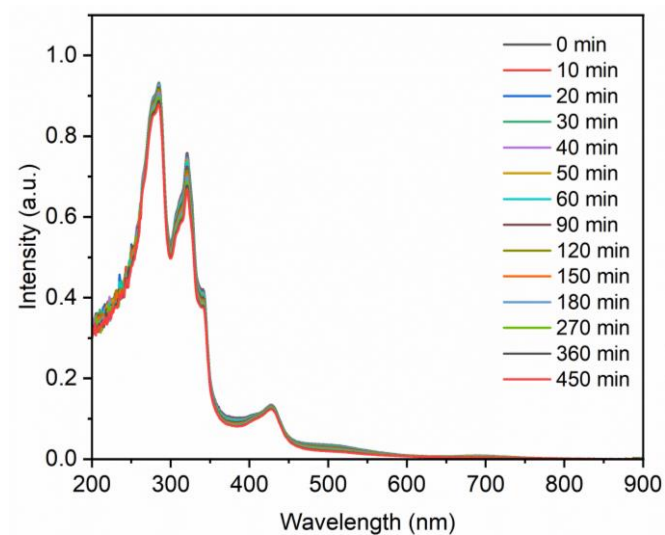

**Figure S35.** Decays of UV-vis spectra of **3d** ( $\lambda = 428$  nm) in DMF ( $c = 10^{-5}$  M).

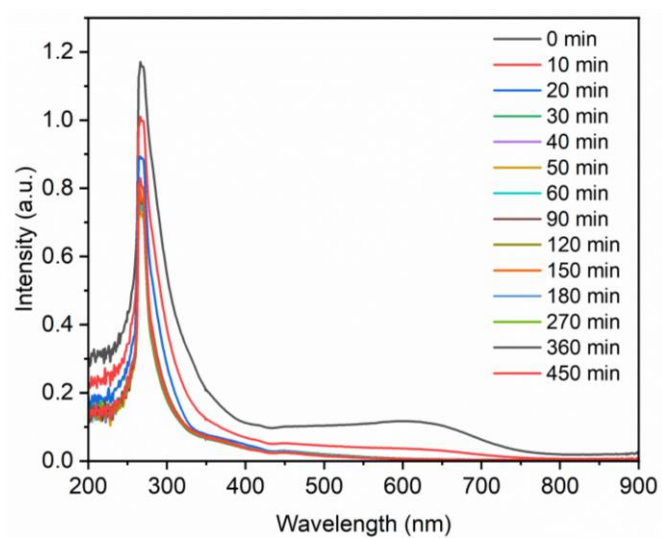

**Figure S36.** Decays of UV-vis spectra of **C** ( $\lambda = 600$  nm) in DMF ( $c = 10^{-5}$  M).

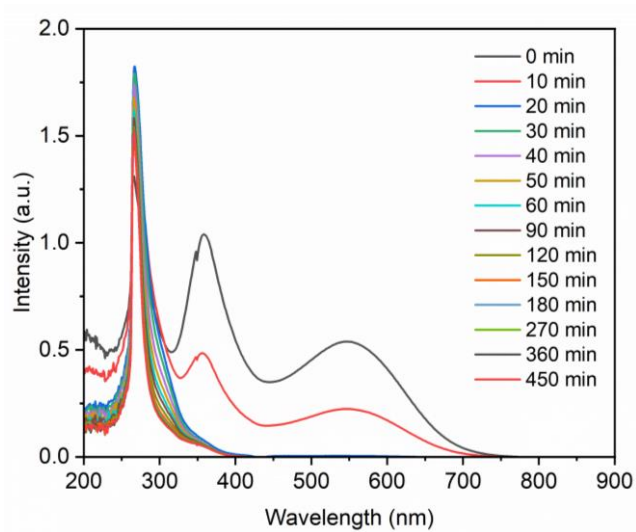

**Figure S37.** Decays of UV-vis spectra of **D** ( $\lambda = 545$  nm) in DMF ( $c = 10^{-5}$  M).

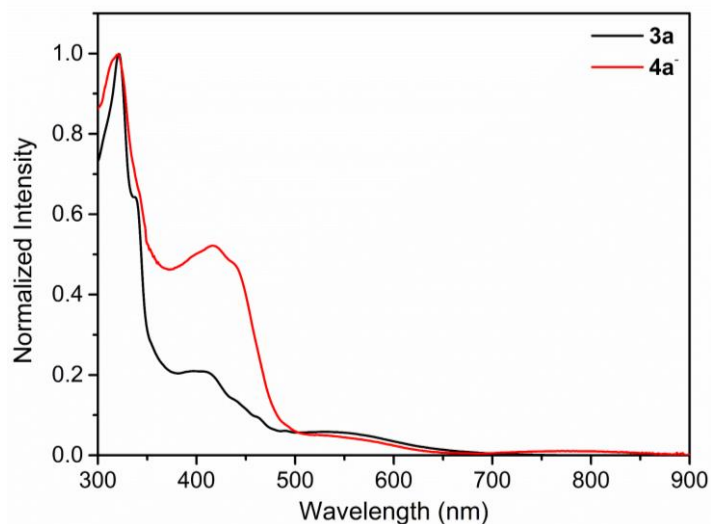

**Figure S38.** UV-vis spectra of **3a** and **4a** in DMF at room temperature ( $c = 10^{-5}$  M).

## 9. TGA spectra

The TGA spectra were carried on the NETZSCH STA 449C microanalyzer from room temperature to 800°C at the heating rate of 10°C·min<sup>-1</sup>. All samples for spectra were prepared under N<sub>2</sub> atmosphere.

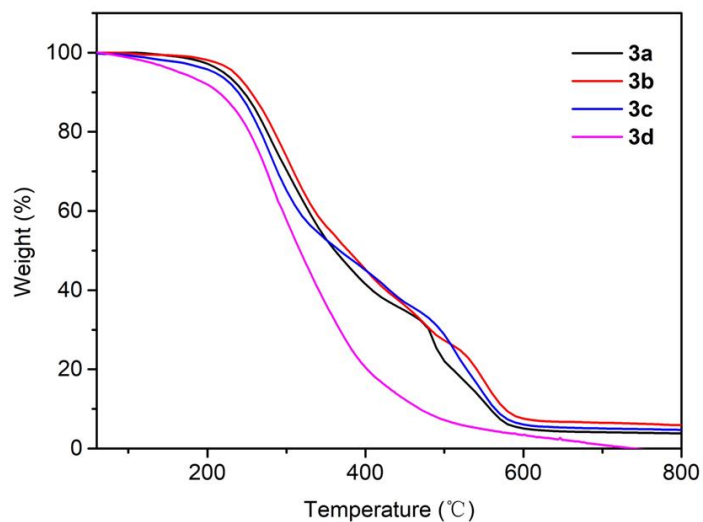

**Figure S39.** The TGA curve of **3a–d** under an N<sub>2</sub> atmosphere with the heating rate of 10°C min<sup>-1</sup>.

## 10. Cartesian coordinates of the optimized geometries by DFT calculations

**Table S7.** Cartesian coordinates of calculated **3a** at the UB3LYP/6-311G\*\* level of theory.

| Atom | X         | Y         | Z         |
|------|-----------|-----------|-----------|
| N    | -0.74259  | 0.586759  | 0.001703  |
| N    | 1.080687  | -0.774961 | 0.081068  |
| O    | -0.369159 | -3.05325  | -0.643594 |
| C    | 1.520419  | 0.534495  | 0.107839  |
| C    | 2.761648  | 1.315341  | 0.118182  |
| C    | 0.417076  | 1.383802  | 0.033169  |
| C    | 2.304356  | 2.6736    | 0.002542  |
| C    | 3.169101  | 3.783602  | -0.056949 |
| C    | -2.065876 | 1.161994  | -0.145026 |
| C    | -0.339594 | -0.791449 | 0.007344  |
| C    | 0.861958  | 2.76717   | -0.07013  |
| C    | 1.994447  | -1.903475 | 0.195801  |
| C    | -2.683983 | 1.765989  | 0.990107  |
| C    | 0.296396  | 4.035758  | -0.239314 |
| H    | -0.784094 | 4.175023  | -0.322848 |
| C    | 2.553072  | 5.074252  | -0.214758 |
| H    | 3.176035  | 5.971643  | -0.271408 |
| C    | 4.130838  | 1.06937   | 0.19571   |
| H    | 4.528087  | 0.055536  | 0.285687  |
| C    | -2.662809 | 1.19454   | -1.435591 |
| C    | -1.05702  | -2.020039 | -0.23775  |
| C    | -2.522844 | -2.179309 | -0.047031 |
| C    | 2.241647  | -2.447982 | 1.482113  |
| C    | 4.57322   | 3.502386  | 0.027811  |
| H    | 5.292505  | 4.326458  | -0.009548 |
| C    | 1.163027  | 5.173579  | -0.307615 |
| H    | 0.707862  | 6.159646  | -0.439158 |
| C    | -1.962698 | 0.625186  | -2.674031 |
| H    | -1.141552 | -0.029206 | -2.332321 |
| C    | 5.025724  | 2.185743  | 0.152506  |
| H    | 6.100377  | 1.993448  | 0.21509   |
| C    | 3.673548  | -3.336569 | -0.795865 |
| H    | 4.220087  | -3.69727  | -1.672075 |

|   |           |           |           |
|---|-----------|-----------|-----------|
| C | 3.227183  | -3.453301 | 1.589815  |
| H | 3.432172  | -3.895918 | 2.568972  |
| C | -3.923522 | 2.411785  | 0.793496  |
| H | -4.417977 | 2.887234  | 1.645445  |
| C | -2.058851 | 1.74708   | 2.393672  |
| H | -1.19832  | 1.052753  | 2.368861  |
| C | 2.693042  | -2.336919 | -0.961885 |
| C | -4.535213 | 2.446491  | -0.468318 |
| H | -5.499119 | 2.948136  | -0.594716 |
| C | 3.943754  | -3.889429 | 0.466213  |
| H | 4.706031  | -4.667136 | 0.57088   |
| C | -3.910516 | 1.840403  | -1.568016 |
| H | -4.390023 | 1.877609  | -2.549664 |
| C | -3.255851 | -1.537333 | 0.977299  |
| H | -2.737162 | -0.855739 | 1.652754  |
| C | 1.458282  | -2.013633 | 2.723485  |
| H | 0.789952  | -1.182872 | 2.432125  |
| C | 2.364992  | -1.812545 | -2.362077 |
| H | 1.620546  | -1.003071 | -2.254247 |
| C | -2.904484 | -0.23881  | -3.547816 |
| H | -3.369858 | -1.044157 | -2.955992 |
| H | -2.331498 | -0.699694 | -4.37145  |
| H | -3.708377 | 0.366822  | -4.003818 |
| C | -3.192066 | -3.131248 | -0.860045 |
| H | -2.606809 | -3.665017 | -1.612897 |
| C | -4.623122 | -1.80168  | 1.160213  |
| H | -5.171223 | -1.298538 | 1.962939  |
| C | -1.333323 | 1.77418   | -3.509134 |
| H | -2.115912 | 2.463455  | -3.875288 |
| H | -0.800987 | 1.363586  | -4.385575 |
| H | -0.61472  | 2.360605  | -2.911179 |
| C | 3.604226  | -1.217829 | -3.07604  |
| H | 4.049668  | -0.392538 | -2.494158 |
| H | 3.317744  | -0.823872 | -4.067474 |
| H | 4.384083  | -1.984529 | -3.235869 |
| C | -4.558834 | -3.390242 | -0.682614 |
| H | -5.061306 | -4.119834 | -1.325152 |

|   |           |           |           |
|---|-----------|-----------|-----------|
| C | -5.28434  | -2.722083 | 0.325437  |
| H | -6.349394 | -2.928084 | 0.467053  |
| C | 2.390087  | -1.490737 | 3.845901  |
| H | 3.071552  | -2.283584 | 4.203466  |
| H | 1.793401  | -1.147786 | 4.710029  |
| H | 3.006483  | -0.64527  | 3.494404  |
| C | -3.047922 | 1.246509  | 3.480221  |
| H | -3.891174 | 1.948485  | 3.607437  |
| H | -2.528088 | 1.17514   | 4.451932  |
| H | -3.467045 | 0.254833  | 3.244353  |
| C | 1.707662  | -2.933113 | -3.211333 |
| H | 2.416513  | -3.76329  | -3.384586 |
| H | 1.4026    | -2.536321 | -4.196867 |
| H | 0.822935  | -3.327764 | -2.686539 |
| C | 0.560012  | -3.172232 | 3.232272  |
| H | -0.097225 | -3.541089 | 2.427718  |
| H | -0.068071 | -2.83192  | 4.075134  |
| H | 1.173328  | -4.020175 | 3.587288  |
| C | -1.526812 | 3.147565  | 2.803682  |
| H | -0.760113 | 3.51746   | 2.105531  |
| H | -1.079385 | 3.102559  | 3.812731  |
| H | -2.352152 | 3.88247   | 2.831396  |

$E$  (UB3LYP/6-311G\*\*) = -1887.81543602 Hartree

**Table S8.** Cartesians coordinates of calculated **3b** at the UB3LYP/6-311G\*\* level of theory.

| Atom | X         | Y         | Z         |
|------|-----------|-----------|-----------|
| N    | -0.172358 | 0.850867  | -0.0076   |
| N    | -1.474344 | -0.996478 | 0.09243   |
| C    | -1.509084 | 1.24601   | -0.013332 |
| C    | -3.711353 | 0.466681  | 0.057246  |
| C    | -2.014263 | -2.341814 | 0.189707  |
| C    | -3.69254  | 1.893638  | -0.074284 |
| C    | -2.354146 | 2.424047  | -0.136396 |
| C    | -2.29377  | 0.106183  | 0.071237  |
| C    | 0.90099   | 1.815133  | -0.084549 |
| C    | -4.853837 | 2.682035  | -0.154168 |



|   |           |           |           |
|---|-----------|-----------|-----------|
| O | 0.580929  | -2.746184 | -0.388394 |
| C | -0.127512 | -0.571138 | 0.040078  |
| C | -2.203132 | 3.799256  | -0.311718 |
| H | -1.214807 | 4.26249   | -0.385974 |
| C | 1.215478  | 2.573551  | 1.077271  |
| C | -4.662232 | 4.094009  | -0.3203   |
| H | -5.530554 | 4.757444  | -0.391634 |
| C | -4.936568 | -0.184968 | 0.128987  |
| H | -5.000999 | -1.272174 | 0.23039   |
| C | -2.545756 | -2.937814 | -0.980333 |
| C | -2.12212  | -2.939872 | 1.467037  |
| C | -6.101413 | 1.985496  | -0.075245 |
| H | -7.040012 | 2.54816   | -0.128224 |
| C | -3.373555 | 4.613865  | -0.400355 |
| H | -3.241815 | 5.692302  | -0.53682  |
| C | 1.538096  | 2.035306  | -1.332183 |
| F | 7.379873  | -1.888386 | -0.203051 |
| C | -6.127895 | 0.59973   | 0.064322  |
| H | -7.092951 | 0.08643   | 0.122973  |
| C | -2.786198 | -4.177824 | 1.549751  |
| H | -2.873832 | -4.670793 | 2.523689  |
| C | 2.211422  | 3.560718  | 0.954187  |
| H | 2.4778    | 4.162113  | 1.829968  |
| F | 7.14413   | -0.275537 | 1.274812  |
| F | 7.086578  | 0.178035  | -0.868631 |
| C | -3.204831 | -4.171365 | -0.836106 |
| H | -3.613959 | -4.663183 | -1.724972 |
| C | 2.390959  | -1.244491 | -0.061859 |
| C | 0.932435  | -1.545147 | -0.137361 |
| C | -3.331239 | -4.787041 | 0.414892  |
| H | -3.847598 | -5.748776 | 0.503035  |
| C | 2.869291  | 3.784113  | -0.260032 |
| H | 3.64522   | 4.553787  | -0.328332 |
| C | 2.987038  | -0.313788 | 0.815035  |
| H | 2.357922  | 0.278776  | 1.4789    |
| C | 2.532853  | 3.028608  | -1.388201 |
| H | 3.045019  | 3.218943  | -2.336361 |

|   |           |           |           |
|---|-----------|-----------|-----------|
| C | 0.532695  | 2.363917  | 2.433263  |
| H | -0.170956 | 1.518776  | 2.335234  |
| C | -2.348355 | -2.333889 | -2.369009 |
| H | -1.917197 | -1.325218 | -2.243182 |
| C | 3.246185  | -2.060811 | -0.844616 |
| H | 2.788235  | -2.824616 | -1.47861  |
| C | 4.375417  | -0.161692 | 0.876219  |
| H | 4.817688  | 0.557266  | 1.571279  |
| C | 5.207309  | -0.950491 | 0.063076  |
| C | 1.125872  | 1.29186   | -2.602025 |
| H | 0.521404  | 0.418044  | -2.304286 |
| C | 4.631926  | -1.907931 | -0.79561  |
| H | 5.27717   | -2.539159 | -1.413467 |
| C | -1.496581 | -2.324706 | 2.715781  |
| H | -1.126259 | -1.318407 | 2.45117   |
| C | 6.696583  | -0.739182 | 0.070953  |
| C | -3.672339 | -2.173402 | -3.14398  |
| H | -4.151082 | -3.148984 | -3.342    |
| H | -3.484521 | -1.695739 | -4.121704 |
| H | -4.393225 | -1.547169 | -2.591169 |
| C | -0.285308 | 3.606305  | 2.853928  |
| H | 0.36925   | 4.486119  | 2.988103  |
| H | -0.793606 | 3.418334  | 3.816046  |
| H | -1.053731 | 3.862384  | 2.107503  |
| C | 2.330803  | 0.759789  | -3.404197 |
| H | 2.949689  | 1.578848  | -3.811153 |
| H | 1.973321  | 0.164482  | -4.262347 |
| H | 2.975432  | 0.116298  | -2.783734 |
| C | 0.234232  | 2.199432  | -3.482112 |
| H | -0.660968 | 2.542247  | -2.935829 |
| H | -0.100334 | 1.653311  | -4.381767 |
| H | 0.790652  | 3.093798  | -3.815826 |
| C | 1.538367  | 2.006233  | 3.552245  |
| H | 2.107998  | 1.088797  | 3.330806  |
| H | 0.998681  | 1.844088  | 4.501683  |
| H | 2.265154  | 2.820692  | 3.719503  |
| C | -2.515579 | -2.151589 | 3.86134   |

|   |           |           |           |
|---|-----------|-----------|-----------|
| H | -3.3717   | -1.528989 | 3.549362  |
| H | -2.036126 | -1.666121 | 4.729633  |
| H | -2.912528 | -3.123211 | 4.205059  |
| C | -0.275861 | -3.161227 | 3.163123  |
| H | -0.5881   | -4.167747 | 3.494985  |
| H | 0.241123  | -2.672952 | 4.008532  |
| H | 0.437582  | -3.285281 | 2.332302  |
| C | -1.323921 | -3.173699 | -3.166074 |
| H | -0.383122 | -3.264457 | -2.599465 |
| H | -1.115459 | -2.700994 | -4.142909 |
| H | -1.711037 | -4.19043  | -3.359015 |

$E$  (UB3LYP/6-311G\*\*) = -2224.40443854 Hartree

**Table S9.** Cartesians coordinates of calculated **3c** at the UB3LYP/6-311G\*\* level of theory.

| Atom | X         | Y         | Z         |
|------|-----------|-----------|-----------|
| N    | 1.219827  | -0.935471 | 0.100603  |
| N    | -0.23959  | 0.788245  | -0.027131 |
| O    | -0.659115 | -2.865289 | -0.405018 |
| C    | 3.184069  | 2.124597  | -0.033299 |
| C    | 4.277821  | 3.007998  | -0.097141 |
| C    | 1.878026  | -2.22763  | 0.196907  |
| C    | 1.062079  | 1.30287   | -0.006419 |
| C    | 1.939561  | 0.229673  | 0.095608  |
| C    | 3.323079  | 0.706599  | 0.104233  |
| C    | 1.804094  | 2.541125  | -0.118922 |
| C    | -1.386756 | 1.659067  | -0.112371 |
| C    | -0.156537 | -0.633846 | 0.018573  |
| O    | -6.813279 | -1.558031 | -0.138473 |
| C    | 2.020428  | -2.823952 | 1.471583  |
| C    | 1.544192  | 3.904621  | -0.298364 |
| H    | 0.522267  | 4.284475  | -0.389128 |
| C    | 2.484435  | -2.757917 | -0.968143 |
| C    | 4.597828  | 0.156056  | 0.197772  |
| H    | 4.7495    | -0.9222   | 0.303496  |
| C    | 3.972557  | 4.400512  | -0.26911  |
| H    | 4.783631  | 5.133684  | -0.329097 |

|   |           |           |           |
|---|-----------|-----------|-----------|
| C | 2.644     | 4.809815  | -0.369138 |
| H | 2.42617   | 5.874019  | -0.509846 |
| C | -1.121713 | -1.701292 | -0.173295 |
| C | -1.771762 | 2.38766   | 1.047405  |
| C | 2.801563  | -3.991394 | 1.55705   |
| H | 2.922114  | -4.482288 | 2.528701  |
| C | 5.574885  | 2.416306  | 0.003726  |
| H | 6.464423  | 3.055131  | -0.036254 |
| C | -2.028681 | 1.833837  | -1.365095 |
| C | 5.717952  | 1.035627  | 0.148851  |
| H | 6.722524  | 0.607138  | 0.224068  |
| C | -2.602731 | -1.527952 | -0.137237 |
| C | 3.259013  | -3.922195 | -0.821064 |
| H | 3.731889  | -4.363059 | -1.705069 |
| C | -2.833975 | 3.302107  | 0.91626   |
| H | -3.152522 | 3.880112  | 1.790558  |
| C | 3.423746  | -4.53337  | 0.427657  |
| H | 4.031722  | -5.439775 | 0.518439  |
| C | -3.089348 | 2.755835  | -1.430776 |
| H | -3.601104 | 2.913982  | -2.385268 |
| C | -3.307265 | -0.664535 | 0.72112   |
| H | -2.759076 | -0.009831 | 1.399659  |
| C | -3.489669 | 3.484856  | -0.305902 |
| H | -4.313883 | 4.202068  | -0.383213 |
| C | -5.443163 | -1.498312 | -0.080158 |
| C | 2.248967  | -2.163908 | -2.355477 |
| H | 1.72977   | -1.197939 | -2.228162 |
| C | -1.090922 | 2.219431  | 2.409544  |
| H | -0.329365 | 1.426066  | 2.313655  |
| C | -3.364254 | -2.41229  | -0.945131 |
| H | -2.826031 | -3.125049 | -1.576109 |
| C | -1.557098 | 1.117492  | -2.629586 |
| H | -0.899529 | 0.286039  | -2.323421 |
| C | 1.313835  | -2.284144 | 2.711968  |
| H | 0.850243  | -1.317736 | 2.446407  |
| C | -4.709373 | -0.638602 | 0.758046  |
| H | -5.211924 | 0.043771  | 1.448126  |

|   |           |           |           |
|---|-----------|-----------|-----------|
| C | -4.755582 | -2.391472 | -0.93183  |
| H | -5.341023 | -3.06421  | -1.566017 |
| C | 3.560488  | -1.883121 | -3.116719 |
| H | 4.218413  | -1.199835 | -2.553296 |
| H | 3.340035  | -1.417131 | -4.093314 |
| H | 4.123656  | -2.812022 | -3.316353 |
| C | -2.717706 | 0.505191  | -3.440022 |
| H | -3.318261 | -0.18431  | -2.824759 |
| H | -2.314508 | -0.061071 | -4.297757 |
| H | -3.389988 | 1.280265  | -3.848917 |
| C | -0.718274 | 2.078109  | -3.505029 |
| H | -1.329545 | 2.930814  | -3.85203  |
| H | -0.337068 | 1.550252  | -4.397094 |
| H | 0.144894  | 2.483699  | -2.950573 |
| C | 0.172734  | -3.240649 | 3.128688  |
| H | -0.511698 | -3.421786 | 2.284123  |
| H | -0.402057 | -2.814527 | 3.970379  |
| H | 0.575485  | -4.216502 | 3.454582  |
| C | -7.544196 | -0.679905 | 0.71558   |
| H | -8.606146 | -0.879354 | 0.510753  |
| H | -7.320981 | 0.381873  | 0.496168  |
| H | -7.333446 | -0.88036  | 1.783638  |
| C | 2.286561  | -2.020635 | 3.879894  |
| H | 2.766741  | -2.951846 | 4.229174  |
| H | 1.743162  | -1.588809 | 4.738964  |
| H | 3.085125  | -1.316562 | 3.589456  |
| C | 1.309436  | -3.085758 | -3.166486 |
| H | 1.787952  | -4.061889 | -3.364384 |
| H | 1.065447  | -2.625528 | -4.141068 |
| H | 0.377086  | -3.266013 | -2.607389 |
| C | -2.08242  | 1.783788  | 3.512985  |
| H | -2.86306  | 2.546988  | 3.680028  |
| H | -1.544047 | 1.647228  | 4.467312  |
| H | -2.586636 | 0.832839  | 3.273826  |
| C | -0.364923 | 3.512123  | 2.846462  |
| H | 0.392365  | 3.824102  | 2.10996   |
| H | 0.143977  | 3.352915  | 3.813542  |

---

|   |           |          |          |
|---|-----------|----------|----------|
| H | -1.079215 | 4.344813 | 2.977916 |
|---|-----------|----------|----------|

---

$E$  (UB3LYP/6-311G\*\*) = -2002.33369468 Hartree

**Table S10.** Cartesians coordinates of calculated **3d** at the UB3LYP/6-311G\*\* level of theory.

| Atom | X         | Y         | Z         |
|------|-----------|-----------|-----------|
| O    | 0.706817  | -2.74855  | 0.461776  |
| N    | -0.010082 | 0.848427  | 0.048928  |
| N    | -1.319961 | -0.986806 | -0.092709 |
| N    | 6.768074  | -0.816279 | -0.101378 |
| C    | -2.136268 | 0.111643  | -0.090315 |
| C    | -2.194144 | 2.423797  | 0.146927  |
| C    | -1.351603 | 1.257131  | 0.025859  |
| C    | 1.065218  | 1.803446  | 0.160846  |
| C    | -3.553897 | 0.469202  | -0.105799 |
| C    | -3.534293 | 1.892108  | 0.046318  |
| C    | 2.530564  | -1.26957  | 0.101185  |
| C    | 0.022626  | -0.573355 | -0.005202 |
| C    | 1.689366  | 1.996941  | 1.419779  |
| C    | -1.855782 | -2.33195  | -0.221998 |
| C    | -2.407033 | -2.949868 | 0.926758  |
| C    | 1.394956  | 2.589772  | -0.978541 |
| C    | 1.07613   | -1.562657 | 0.188511  |
| C    | -1.936941 | -2.905797 | -1.511871 |
| C    | 3.131803  | -0.338373 | -0.769172 |
| H    | 2.503765  | 0.269488  | -1.42141  |
| C    | -4.778066 | -0.187696 | -0.215022 |
| H    | -4.83555  | -1.273476 | -0.335267 |
| C    | -4.700621 | 2.679454  | 0.11154   |
| C    | -2.054146 | 3.80503   | 0.347954  |
| H    | -1.06997  | 4.270249  | 0.456779  |
| C    | 3.400406  | -2.092821 | 0.856619  |
| H    | 2.95413   | -2.863584 | 1.491713  |
| C    | -2.24978  | -2.36425  | 2.327984  |
| H    | -1.804474 | -1.358852 | 2.228835  |
| C    | -3.055693 | -4.184115 | 0.747741  |
| H    | -3.480449 | -4.692735 | 1.619728  |
| C    | 4.516988  | -0.19461  | -0.85754  |

---

---

|   |           |           |           |
|---|-----------|-----------|-----------|
| H | 4.922438  | 0.529525  | -1.567478 |
| C | -4.516523 | 4.090749  | 0.302512  |
| H | -5.387392 | 4.751568  | 0.364628  |
| C | -3.226868 | 4.609919  | 0.420298  |
| H | -3.102285 | 5.686969  | 0.577349  |
| C | 0.730768  | 2.409734  | -2.347745 |
| H | 0.026676  | 1.562456  | -2.276795 |
| C | 4.78478   | -1.954196 | 0.794252  |
| H | 5.406323  | -2.6135   | 1.404698  |
| C | 1.261738  | 1.227706  | 2.668728  |
| H | 0.654818  | 0.364971  | 2.345858  |
| C | -2.592784 | -4.14559  | -1.629569 |
| H | -2.662138 | -4.619758 | -2.614302 |
| C | 5.387086  | -0.983276 | -0.056294 |
| C | -3.15444  | -4.778447 | -0.516149 |
| H | -3.664181 | -5.740955 | -0.631145 |
| C | -5.940639 | 1.980523  | -0.005081 |
| H | -6.881501 | 2.541198  | 0.034952  |
| C | 2.387379  | 3.575425  | -0.821441 |
| H | 2.661539  | 4.197967  | -1.680153 |
| C | -1.300053 | -2.260745 | -2.739958 |
| H | -0.926121 | -1.2641   | -2.446745 |
| C | 7.62867   | -1.781728 | 0.568477  |
| H | 7.407892  | -1.821762 | 1.65054   |
| H | 8.676906  | -1.467593 | 0.454688  |
| H | 7.526529  | -2.809318 | 0.160153  |
| C | -5.9668   | 0.592505  | -0.165352 |
| H | -6.93179  | 0.082886  | -0.252971 |
| C | 2.682267  | 2.989381  | 1.510695  |
| H | 3.180414  | 3.160189  | 2.47028   |
| C | 3.030279  | 3.772643  | 0.405183  |
| H | 3.801303  | 4.544631  | 0.501576  |
| C | 1.75349   | 2.076933  | -3.459065 |
| H | 2.481093  | 2.896417  | -3.597665 |
| H | 1.228499  | 1.934597  | -4.420033 |
| H | 2.32122   | 1.155726  | -3.247778 |
| C | -1.264236 | -3.222801 | 3.153169  |

---

|   |           |           |           |
|---|-----------|-----------|-----------|
| H | -1.667763 | -4.237698 | 3.320982  |
| H | -1.089191 | -2.762127 | 4.14228   |
| H | -0.303489 | -3.315294 | 2.621717  |
| C | 2.457247  | 0.669952  | 3.46752   |
| H | 3.101026  | 0.036218  | 2.835933  |
| H | 2.089998  | 0.058094  | 4.309975  |
| H | 3.078106  | 1.476374  | 3.896817  |
| C | -3.600171 | -2.19798  | 3.055516  |
| H | -4.292624 | -1.557517 | 2.483381  |
| H | -3.443779 | -1.733326 | 4.045056  |
| H | -4.095917 | -3.170942 | 3.223706  |
| C | -0.08319  | 3.659479  | -2.753599 |
| H | -0.859564 | 3.89996   | -2.01038  |
| H | -0.580766 | 3.489292  | -3.724757 |
| H | 0.572551  | 4.541929  | -2.864372 |
| C | 7.352667  | 0.040343  | -1.123172 |
| H | 7.162383  | -0.324045 | -2.155106 |
| H | 8.441112  | 0.090455  | -0.970325 |
| H | 6.957055  | 1.06929   | -1.046821 |
| C | -0.081224 | -3.089284 | -3.20636  |
| H | 0.634053  | -3.233603 | -2.380342 |
| H | 0.43648   | -2.582204 | -4.040284 |
| H | -0.394488 | -4.087532 | -3.561693 |
| C | -2.313644 | -2.051894 | -3.884485 |
| H | -2.712441 | -3.012465 | -4.256268 |
| H | -1.829313 | -1.543526 | -4.736924 |
| H | -3.168249 | -1.435208 | -3.557564 |
| C | 0.366535  | 2.120583  | 3.559878  |
| H | 0.92377   | 3.005774  | 3.916276  |
| H | 0.021791  | 1.557609  | 4.44538   |
| H | -0.521925 | 2.477912  | 3.012103  |

$E(\text{UB3LYP/6-311G}^{**}) = -2021.87373474$  Hartree

**Table S11.** Cartesians coordinates of calculated  $4a^-$  at the B3LYP-D3-(BJ)/def2-SVP level of theory.

| Atom | X           | Y           | Z           |
|------|-------------|-------------|-------------|
| O    | -0.37926000 | -3.06484400 | -0.55305900 |



|   |             |             |             |
|---|-------------|-------------|-------------|
| N | 1.10346900  | -0.81624100 | -0.01049700 |
| N | -0.70549700 | 0.59006600  | -0.03066900 |
| C | -0.34979500 | -0.80895600 | -0.01874400 |
| C | -2.40138300 | 1.69432600  | 1.35522200  |
| C | -1.98632700 | 1.22183900  | 0.08892500  |
| C | -2.75562000 | 1.43784400  | -1.07347900 |
| C | -3.95483000 | 2.14905600  | -0.94439900 |
| H | -4.56353400 | 2.33149800  | -1.82550000 |
| C | -4.37966100 | 2.62768700  | 0.29204000  |
| H | -5.31405100 | 3.17923200  | 0.36982600  |
| C | -3.60867000 | 2.40071700  | 1.42868400  |
| H | -3.94706800 | 2.77920900  | 2.39020200  |
| C | -2.53940700 | -2.12514000 | -0.37133200 |
| C | -3.46959200 | -1.50829600 | 0.48556200  |
| H | -3.11717600 | -0.83302100 | 1.25374600  |
| C | -4.83721500 | -1.76937700 | 0.38884100  |
| H | -5.52362700 | -1.27303800 | 1.07268100  |
| C | -5.32284100 | -2.67439900 | -0.55723600 |
| H | -6.38823500 | -2.88339000 | -0.62844200 |
| C | -4.40886500 | -3.33031000 | -1.39297400 |
| H | -4.76545100 | -4.05490000 | -2.12370200 |
| C | -3.04638600 | -3.07258300 | -1.29060400 |
| H | -2.32594400 | -3.60357100 | -1.90387300 |
| C | 0.44315600  | 1.33541700  | -0.09869700 |
| C | 2.27447700  | 2.67751400  | -0.13145500 |
| C | 0.85200700  | 2.74635600  | -0.14204300 |
| C | 1.54644000  | 0.51775700  | -0.08395100 |
| C | -1.05434200 | -1.98883700 | -0.31719900 |
| C | 3.90926200  | -3.16801700 | -0.60271700 |
| H | 4.61721000  | -3.41606000 | -1.38951000 |
| C | 3.10498000  | 3.80060200  | -0.15591900 |
| C | 2.74220700  | 1.31153700  | -0.08174800 |
| C | 4.12610400  | 1.11894900  | -0.02796700 |
| H | 4.55472400  | 0.12369800  | 0.03206300  |
| C | 4.97944300  | 2.25404600  | -0.04895500 |

|   |             |             |             |
|---|-------------|-------------|-------------|
| H | 6.05367600  | 2.07934800  | -0.01051800 |
| C | 2.91661300  | -2.21425700 | -0.84837000 |
| C | 3.04237300  | -3.56483100 | 1.60461500  |
| H | 3.08677100  | -4.10394500 | 2.54870900  |
| C | 1.99726400  | -1.90536200 | 0.18805900  |
| C | 1.04742500  | -2.33290900 | 2.53748000  |
| H | 0.40817500  | -1.50531800 | 2.22016900  |
| C | 3.98343800  | -3.83935800 | 0.61670100  |
| H | 4.75858700  | -4.58368400 | 0.78735900  |
| C | 2.44960700  | 5.06362900  | -0.20862700 |
| H | 3.04487200  | 5.97507400  | -0.22978800 |
| C | 4.52045600  | 3.56067700  | -0.11544000 |
| H | 5.21642500  | 4.39588100  | -0.13031700 |
| C | 0.24136100  | 3.98707000  | -0.19675500 |
| H | -0.83997200 | 4.09097900  | -0.21028000 |
| C | 2.72146800  | -1.65346800 | -2.25569500 |
| H | 2.16732500  | -0.71533100 | -2.17187600 |
| C | 2.04972800  | -2.59615600 | 1.42075500  |
| C | -1.58202800 | 1.46466600  | 2.62452900  |
| H | -0.70926800 | 0.86437600  | 2.35417700  |
| C | -2.36924300 | 0.67585800  | 3.68994300  |
| H | -2.69635500 | -0.29835300 | 3.31360900  |
| H | -1.73691400 | 0.50065600  | 4.56894600  |
| H | -3.25849700 | 1.22440900  | 4.02509200  |
| C | 1.06453000  | 5.14513700  | -0.23046800 |
| H | 0.58771400  | 6.12178900  | -0.27160200 |
| C | -2.28479900 | 0.95522300  | -2.44193800 |
| H | -1.50007000 | 0.21254200  | -2.27359100 |
| C | -1.06776500 | 2.79234700  | 3.21606500  |
| H | -1.89886000 | 3.43580900  | 3.53278300  |
| H | -0.44308000 | 2.59795200  | 4.09654900  |
| H | -0.46672600 | 3.34679500  | 2.48971300  |
| C | -3.40021100 | 0.26149800  | -3.24422900 |
| H | -4.19885600 | 0.95954400  | -3.52698500 |
| H | -2.98495200 | -0.14922100 | -4.17256800 |

|   |             |             |             |
|---|-------------|-------------|-------------|
| H | -3.84399000 | -0.56236000 | -2.67847000 |
| C | 4.02677100  | -1.33560000 | -3.00205900 |
| H | 4.62293700  | -2.23572200 | -3.19925900 |
| H | 3.79783900  | -0.88357000 | -3.97551200 |
| H | 4.64850300  | -0.62886400 | -2.44079500 |
| C | 1.83746300  | -2.63355800 | -3.05764800 |
| H | 0.93170300  | -2.87283600 | -2.48866000 |
| H | 1.55878400  | -2.19913000 | -4.02796300 |
| H | 2.37864900  | -3.57012500 | -3.25012100 |
| C | 1.73187100  | -1.90819100 | 3.85011000  |
| H | 2.35816800  | -1.02058300 | 3.70274000  |
| H | 0.98029400  | -1.67214600 | 4.61528400  |
| H | 2.37105800  | -2.70409000 | 4.25305300  |
| C | 0.12918500  | -3.55473500 | 2.74077600  |
| H | 0.69659800  | -4.41827600 | 3.11391500  |
| H | -0.65758600 | -3.33166200 | 3.47431200  |
| H | -0.33272400 | -3.82749800 | 1.78718400  |
| C | -1.67229300 | 2.11749700  | -3.25044500 |
| H | -0.84051700 | 2.58573400  | -2.71464600 |
| H | -1.29385500 | 1.75376900  | -4.21383100 |
| H | -2.42255900 | 2.89291600  | -3.45497800 |

$E$  (B3LYP-D3-(BJ)/def2-SVP) = -1888.522639 Hartree

## 11. Abstracted results of TD-DFT calculations

**Table S12.** UB3LYP/def2-TZVP computed transitions for **3a** with oscillator strengths ( $f$ ) greater than 0.01.

166A is SOMO

|   | $\lambda_{(nm)}$ | $f$    | Assignment            |
|---|------------------|--------|-----------------------|
| 1 | 561.78           | 0.0094 | 165A -> 167A 0.83865  |
|   |                  |        | 165B -> 166B 0.24599  |
| 2 | 423.61           | 0.1804 | 156B -> 167B -0.32715 |
|   |                  |        | 164B -> 167B 0.79924  |
|   |                  |        | 165B -> 167B 0.28542  |
| 3 | 362.69           | 0.0135 | 162A -> 173A 0.38482  |
|   |                  |        | 165A -> 172A -0.24902 |
|   |                  |        | 162B -> 172B 0.33699  |
|   |                  |        | 162B -> 173B -0.22238 |
|   |                  |        | 164B -> 171B 0.22555  |
|   |                  |        | 165B -> 167B 0.25273  |
| 4 | 359.69           | 0.0509 | 161A -> 171A 0.25752  |
|   |                  |        | 166A -> 171A 0.21376  |
|   |                  |        | 160B -> 170B -0.24323 |

|    |        |        |              |          |
|----|--------|--------|--------------|----------|
|    |        |        | 165B -> 167B | 0.53450  |
| 5  | 359.05 | 0.0339 | 160A -> 170A | -0.25874 |
|    |        |        | 161A -> 171A | -0.28322 |
|    |        |        | 157B -> 169B | 0.22707  |
|    |        |        | 160B -> 170B | 0.29466  |
|    |        |        | 165B -> 167B | 0.39126  |
| 6  | 349.08 | 0.0517 | 158A -> 167A | 0.22862  |
|    |        |        | 166A -> 172A | 0.72153  |
|    |        |        | 158B -> 166B | 0.21265  |
|    |        |        | 165B -> 167B | -0.32621 |
| 7  | 340.63 | 0.1743 | 166A -> 171A | 0.45797  |
|    |        |        | 166A -> 172A | -0.43750 |
|    |        |        | 166A -> 174A | -0.20386 |
|    |        |        | 165B -> 167B | -0.36872 |
| 8  | 301.16 | 0.1947 | 163A -> 167A | 0.68233  |
|    |        |        | 163B -> 166B | -0.64419 |
| 9  | 283.99 | 0.0317 | 158A -> 167A | 0.35153  |
|    |        |        | 163A -> 168A | 0.29415  |
|    |        |        | 166A -> 175A | 0.41843  |
|    |        |        | 166A -> 180A | 0.34919  |
|    |        |        | 158B -> 166B | -0.32746 |
|    |        |        | 163B -> 167B | 0.22011  |
| 10 | 276.46 | 0.0666 | 158A -> 167A | 0.34590  |
|    |        |        | 164A -> 167A | -0.21546 |
|    |        |        | 158B -> 166B | -0.46205 |
|    |        |        | 163B -> 168B | 0.57305  |
| 11 | 274.00 | 0.0409 | 159A -> 174A | 0.27758  |
|    |        |        | 166A -> 175A | 0.24677  |
|    |        |        | 159B -> 174B | -0.28508 |
|    |        |        | 161B -> 167B | 0.45070  |
|    |        |        | 162B -> 167B | -0.20698 |

**Table S13.** UB3LYP/def2-TZVP computed transitions for **3b** with oscillator strengths ( $f$ ) greater than 0.01.

182A is SOMO

|   | $\lambda_{(nm)}$ | $f$    | Assignment                                                                                                                                       |
|---|------------------|--------|--------------------------------------------------------------------------------------------------------------------------------------------------|
| 1 | 694.63           | 0.0198 | 180A -> 183A 0.25824<br>182A -> 183A 0.92907<br>181B -> 182B 0.19219                                                                             |
| 2 | 432.54           | 0.3427 | 172B -> 183B 0.32338<br>180B -> 183B 0.81579                                                                                                     |
| 3 | 348.48           | 0.1518 | 172A -> 184A -0.20769<br>174A -> 184A -0.23682<br>172B -> 183B -0.20148<br>176B -> 183B -0.21699<br>176B -> 184B 0.20573<br>181B -> 183B 0.34881 |
| 4 | 300.90           | 0.2227 | 179A -> 183A 0.67313<br>179B -> 182B -0.64545                                                                                                    |
| 5 | 278.61           | 0.0169 | 175A -> 185A 0.40004<br>182A -> 191A -0.24243<br>175B -> 184B 0.22397<br>175B -> 185B -0.25034<br>175B -> 186B 0.22303                           |

|   |        |        |                                                                                                                                                |
|---|--------|--------|------------------------------------------------------------------------------------------------------------------------------------------------|
|   |        |        | 179B -> 182B 0.23156<br>181B -> 185B -0.20625                                                                                                  |
| 6 | 275.73 | 0.0530 | 175A -> 183A -0.29829<br>180A -> 183A 0.22727<br>175B -> 182B 0.40272<br>179B -> 184B 0.29269<br>179B -> 185B -0.38032<br>179B -> 186B 0.32635 |
| 7 | 274.23 | 0.0261 | 177A -> 186A -0.31838<br>182A -> 191A 0.47963<br>182A -> 193A 0.20054<br>177B -> 185B 0.21475<br>177B -> 186B 0.27747                          |
| 8 | 273.68 | 0.0108 | 177A -> 186A 0.42353<br>177A -> 187A 0.24678<br>182A -> 191A 0.32015<br>177B -> 186B -0.39001<br>177B -> 187B -0.22895                         |
| 9 | 261.6  | 0.0610 | 181A -> 184A 0.20270<br>182A -> 193A 0.43957<br>182A -> 198A -0.24210<br>182A -> 201A -0.29131                                                 |

**Table S14.** UB3LYP/def2-TZVP computed transitions for **3c** with oscillator strengths ( $f$ ) greater than 0.01. 174A is SOMO

|   | $\lambda_{(nm)}$ | $f$    | Assignment                                                                                                              |
|---|------------------|--------|-------------------------------------------------------------------------------------------------------------------------|
| 1 | 536.16           | 0.0075 | 170A -> 175A -0.28725<br>171A -> 175A 0.56414<br>170B -> 174B 0.59395<br>171B -> 174B 0.25872                           |
| 2 | 422.71           | 0.1882 | 164B -> 175B -0.38540<br>170B -> 175B -0.24177<br>172B -> 175B 0.51065<br>173B -> 175B 0.31814                          |
| 3 | 364.96           | 0.0234 | 169A -> 181A 0.21996<br>169B -> 180B 0.28466<br>171B -> 175B -0.22433<br>173B -> 175B 0.40885                           |
| 4 | 361.43           | 0.0355 | 169B -> 180B -0.26241<br>171B -> 175B -0.22564<br>171B -> 179B -0.22644<br>173B -> 175B 0.53065                         |
| 5 | 352.04           | 0.0701 | 174A -> 178A 0.29705<br>174A -> 180A 0.68818<br>172B -> 175B 0.20836<br>173B -> 175B -0.31949                           |
| 6 | 346.02           | 0.0639 | 174A -> 178A -0.32592<br>174A -> 180A 0.45884<br>174A -> 181A -0.40475<br>174A -> 182A 0.38026<br>172B -> 175B -0.20436 |
| 7 | 343.07           | 0.2351 | 174A -> 178A -0.29878<br>174A -> 179A 0.20974<br>174A -> 180A -0.31458<br>174A -> 181A -0.32503                         |

|   |        |        |              |          |
|---|--------|--------|--------------|----------|
|   |        |        | 174A -> 182A | 0.44981  |
|   |        |        | 172B -> 175B | 0.28106  |
|   |        |        | 173B -> 175B | -0.36742 |
| 8 | 300.99 | 0.1808 | 170A -> 175A | -0.29681 |
|   |        |        | 171A -> 175A | 0.60916  |
|   |        |        | 170B -> 174B | -0.57920 |
|   |        |        | 171B -> 174B | -0.27513 |
| 9 | 276.80 | 0.0705 | 166A -> 175A | 0.36291  |
|   |        |        | 166B -> 174B | -0.48228 |
|   |        |        | 170B -> 176B | 0.51887  |
|   |        |        | 171B -> 176B | 0.22475  |

**Table S15.** UB3LYP/def2-TZVP computed transitions for **3d** with oscillator strengths ( $f$ ) greater than 0.01.

178A is SOMO

|   | $\lambda_{(\text{nm})}$ | $f$    | Assignment                                                                                                                                     |
|---|-------------------------|--------|------------------------------------------------------------------------------------------------------------------------------------------------|
| 1 | 515.92                  | 0.0100 | 174A -> 179A 0.59890<br>175A -> 179A -0.21382<br>174B -> 178B 0.64070                                                                          |
| 2 | 426.52                  | 0.1915 | 168B -> 179B -0.35143<br>176B -> 179B 0.66752<br>177B -> 179B -0.45510                                                                         |
| 3 | 372.94                  | 0.0290 | 177A -> 183A 0.21734<br>178A -> 180A -0.25015<br>178A -> 183A 0.37064<br>175B -> 179B 0.39491<br>177B -> 179B 0.34772<br>177B -> 186B 0.29298  |
| 4 | 356.75                  | 0.0837 | 178A -> 182A 0.56680<br>178A -> 184A -0.29612<br>178A -> 186A -0.20584<br>176B -> 179B -0.47761                                                |
| 5 | 350.87                  | 0.1979 | 177A -> 186A -0.24135<br>178A -> 184A 0.33952<br>178A -> 186A 0.57044<br>176B -> 179B -0.54366<br>177B -> 185B 0.20422                         |
| 6 | 348.17                  | 0.0884 | 170A -> 179A 0.55243<br>175A -> 179A 0.21114<br>178A -> 185A 0.23439<br>178A -> 186A -0.33075<br>170B -> 178B 0.45604<br>176B -> 179B -0.29418 |
| 7 | 347.16                  | 0.1187 | 170A -> 179A 0.42896<br>178A -> 182A 0.35196<br>178A -> 185A -0.22954<br>178A -> 186A 0.35065<br>170B -> 178B 0.44969<br>176B -> 179B 0.37717  |
| 8 | 301.17                  | 0.1854 | 174A -> 179A 0.62583<br>175A -> 179A -0.24145<br>174B -> 178B -0.61733                                                                         |
| 9 | 281.20                  | 0.0825 | 170A -> 179A -0.43763<br>174A -> 180A -0.22386                                                                                                 |

|    |        |        |              |          |
|----|--------|--------|--------------|----------|
|    |        |        | 177A -> 179A | 0.60354  |
|    |        |        | 170B -> 178B | 0.47443  |
| 10 | 273.18 | 0.0235 | 171A -> 186A | 0.26337  |
|    |        |        | 177A -> 179A | 0.27997  |
|    |        |        | 177A -> 183A | 0.22942  |
|    |        |        | 177A -> 185A | -0.26280 |
|    |        |        | 171B -> 185B | -0.26778 |
|    |        |        | 172B -> 185B | 0.22288  |
|    |        |        | 174B -> 180B | 0.20349  |
|    |        |        | 177B -> 186B | 0.25931  |

**Table S16.** B3LYP/def2-TZVP computed transitions for **4a<sup>-</sup>** with oscillator strengths (*f*) greater than 0.01. 166 is HOMO

|    | $\lambda_{(nm)}$ | <i>f</i> | Assignment                                                                         |
|----|------------------|----------|------------------------------------------------------------------------------------|
| 1  | 771.51           | 0.0194   | 166 ->168 0.69963                                                                  |
| 2  | 546.25           | 0.1778   | 166 ->169 0.63787<br>166 ->171 0.25073                                             |
| 3  | 513.04           | 0.0690   | 166 ->168 -0.39738<br>166 ->169 -0.20341<br>166 ->170 0.22255<br>166 ->171 0.48474 |
| 4  | 450.44           | 0.01122  | 166 ->172 0.45657<br>166 ->173 -0.45549                                            |
| 5  | 442.77           | 0.0223   | 166 ->172 0.48309<br>166 ->173 0.46919                                             |
| 6  | 423.18           | 0.1410   | 166 ->174 0.66156                                                                  |
| 7  | 393.85           | 0.0245   | 164 ->167 0.64981                                                                  |
| 8  | 291.06           | 0.3684   | 163 ->167 -0.22934<br>166 ->176 0.53345<br>166 ->177 -0.27618                      |
| 9  | 284.58           | 0.1272   | 157 ->167 -0.25427<br>166 ->176 0.25625<br>166 ->177 0.46034<br>166 ->178 0.22247  |
| 10 | 281.14           | 0.0913   | 157 ->167 0.49076<br>163 ->168 -0.21746<br>166 ->177 0.28262                       |
| 11 | 271.06           | 0.1256   | 165 ->171 0.28047<br>166 ->178 0.54095                                             |
| 12 | 269.94           | 0.0190   | 165 ->171 0.51862<br>166 ->178 -0.28654                                            |
| 13 | 244.57           | 0.0116   | 156 ->170 0.21978<br>158 ->170 0.20093<br>159 ->167 0.21794<br>159 ->169 0.28367   |
| 14 | 232.42           | 0.0105   | 166 ->179 -0.26833<br>166 ->183 0.45926<br>166 ->184 -0.24252                      |

## 12. References

- 1 U. El-Ayaan, A. Paulovicova, S. Yamada and Y. Fukuda, The Crystal Structure of Bis[N-(2,6-diisopropylphenyl)imino] Acenaphthene and Studies of Its Copper(I) and Copper(II) Complexes, *J. Coord. Chem.*, 2003, **56**, 373–381.
- 2 K. V. Vasudevan, R. R. Butorac, C. D. Abernethy and A. H. Cowley, Synthesis and Coordination Compounds of a Bis(imino)acenaphthene (BIAN)-Supported N-Heterocyclic Carbene, *Dalton Trans.*, 2010, **39**, 7401–7408.
- 3 J. K. Mahoney, R. Jazzar, G. Royal, D. Martin and G. Bertrand, The Advantages of Cyclic Over Acyclic Carbenes to Access Isolable Captodative C-Centered Radicals, *Chem. Eur. J.*, 2017, **23**, 6206–6212.
- 4 C. L. Deardorff, R. E. Sikma, C. P. Rhodes and T. W. Hudnall, An Air-Stable Radical with a Redox-Chameleonic Amide, *Chem. Commun.*, 2016, **52**, 9024–9027.
- 5 O. V. Dolomanov, L. J. Bourhis, R. J. Gildea, J. A. K. Howard and H. Puschmann, OLEX2: A Complete Structure Solution, Refinement and Analysis Program, *J. Appl. Cryst.*, 2009, **42**, 339–341.
- 6 L. J. Bourhis, O. V. Dolomanov, R. J. Gildea, J. A. K. Howard and H. Puschmann, The Anatomy of a Comprehensive Constrained, Restrained Refinement Program for the Modern Computing Environment - *Olex2 Dissected*, *Acta Cryst. A*, 2015, **71**, 59–75.
- 7 G. M. Sheldrick, Crystal Structure Refinement with SHELXL, *Acta Crystallogr., Sect. C*, 2015, **71**, 3–8.
- 8 S. Stoll and A. Schweiger, EasySpin, a Comprehensive Software Package for Spectral Simulation and Analysis in EPR, *J. Magn. Reson.*, 2006, **178**, 42–55.
- 9 Gaussian 09 rev. E01 (Gaussian, Inc., 2009).
- 10 P. Hohenberg and W. Kohn, Inhomogeneous Electron Gas, *Phys. Rev.*, 1964, **136**, B864–B871.
- 11 W. Kohn and L. J. Sham, Self-Consistent Equations Including Exchange and Correlation Effects, *Phys. Rev.* 1965, **140**, A1133–A1138.
